# Supplementary material for: Machine learning predicts new anti-CRISPR proteins
Source: PubMed Central journal article supplement — Nucleic Acids Res. 2020 Apr 14;48(9):4698–708. doi: 10.1093/nar/gkaa219 (PMC7229843; doi:10.1093/nar/gkaa219), 2020-04-14
Supplement: gkaa219_supplemental_file.pdf [file gkaa219_supplemental_file.pdf]

## Supplementary Information

### Machine Learning Predicts New Anti-CRISPR Proteins

Simon Eitzinger<sup>1†</sup>, Amina Asif<sup>2,3,†</sup>, Kyle E. Watters<sup>1,†</sup>, Anthony T. Iavarone<sup>4</sup>, Gavin J. Knott<sup>1</sup>, Jennifer A. Doudna<sup>1,5-9,\*</sup>, and Fayyaz ul Amir Afsar Minhas<sup>2,10,\*</sup>

<sup>1</sup>Department of Molecular and Cell Biology, University of California Berkeley, Berkeley, CA 94720, USA

<sup>2</sup>Department of Computer and Information Sciences, Pakistan Institute of Engineering and Applied Sciences (PIEAS), PO Nilore, Islamabad, Pakistan.

<sup>3</sup>FAST School of Computing, National University of Computer and Emerging Sciences (NUCES), Islamabad, Pakistan

<sup>4</sup>QB3/Chemistry Mass Spectrometry Facility, University of California, Berkeley, Berkeley, CA, USA

<sup>5</sup>Department of Chemistry, University of California Berkeley, Berkeley, CA, 94720, USA

<sup>6</sup>Innovative Genomics Initiative, University of California Berkeley, Berkeley, CA, 94720, USA

<sup>7</sup>Center for RNA Systems Biology, University of California Berkeley, Berkeley, CA, 94720, USA

<sup>8</sup>Howard Hughes Medical Institute, University of California Berkeley, Berkeley, CA, 94720, USA

<sup>9</sup>Molecular Biophysics & Integrated Bioimaging Division, Lawrence Berkeley National Laboratory, Berkeley, CA, 94720, USA

<sup>10</sup>Department of Computer Science, University of Warwick, Coventry, CV4 7AL, UK

† These authors contributed equally to this work.

\*To whom correspondence should be addressed: [doudna@berkeley.edu](mailto:doudna@berkeley.edu), [fayyaz.minhas14@alumni.colostate.edu](mailto:fayyaz.minhas14@alumni.colostate.edu)

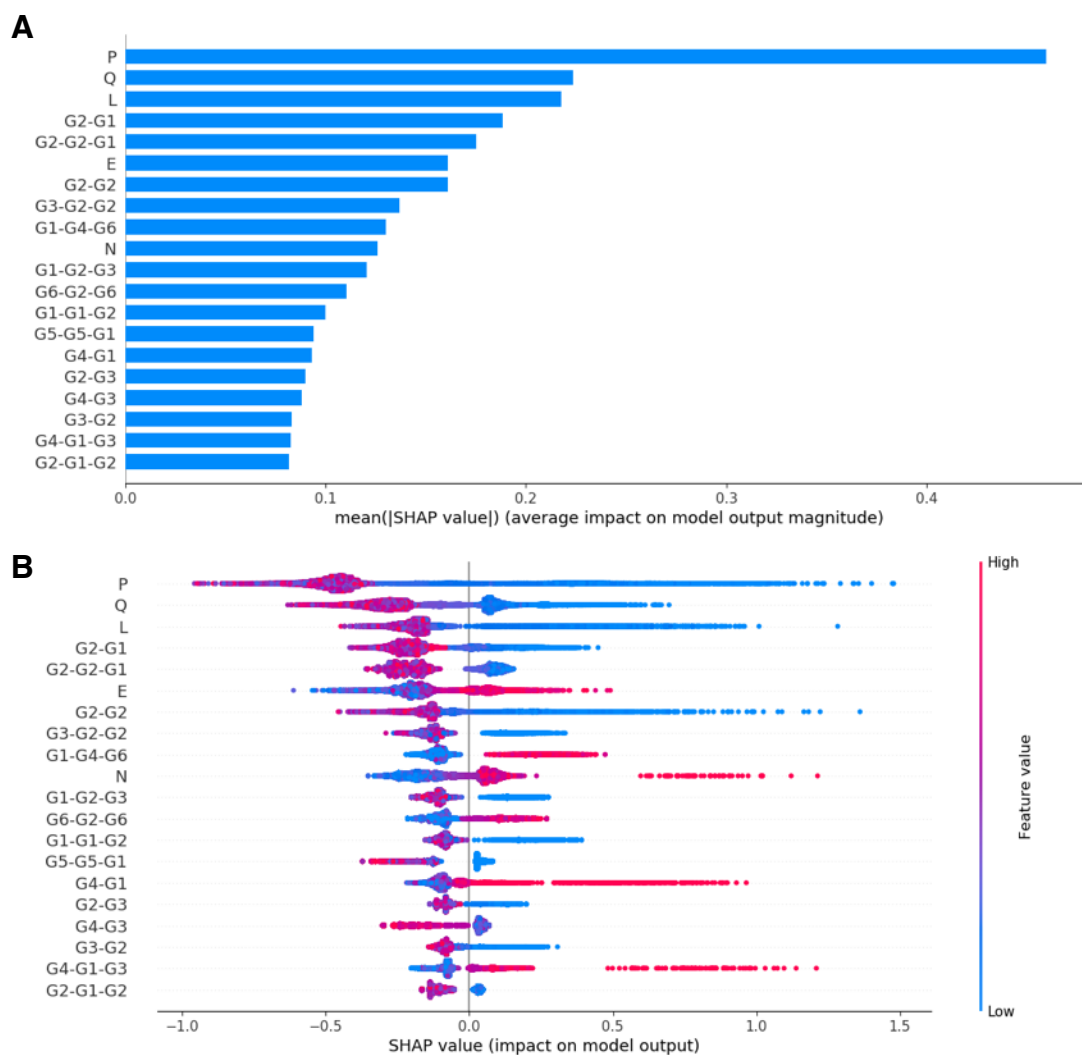

**Figure S1. SHAP analysis of AcRanker features.** (A) Absolute mean of the SHAP (SHapley Additive exPlanations) (1) values as measured for the 20 highest impact features in the AcRanker model. G1-G6 represent amino acid groupings used for computing dimeric and trimeric frequencies in AcRanker. Individual amino acids are grouped according to their side-chain volume and dipole moment (Table S3) (2). (B) Violin plots showing the SHAP value vs. the feature value for the 20 highest impact features in AcRanker. Higher feature values (red) with negative SHAP values indicate features that tend to be absent in the training set anti-CRISPRs, while high measured feature values with positive SHAP values suggest features that are more frequently found in the training set anti-CRISPRs. The data suggest that candidates with lower proline (P), glutamine (Q), and leucine (L) content will tend to have higher rankings.

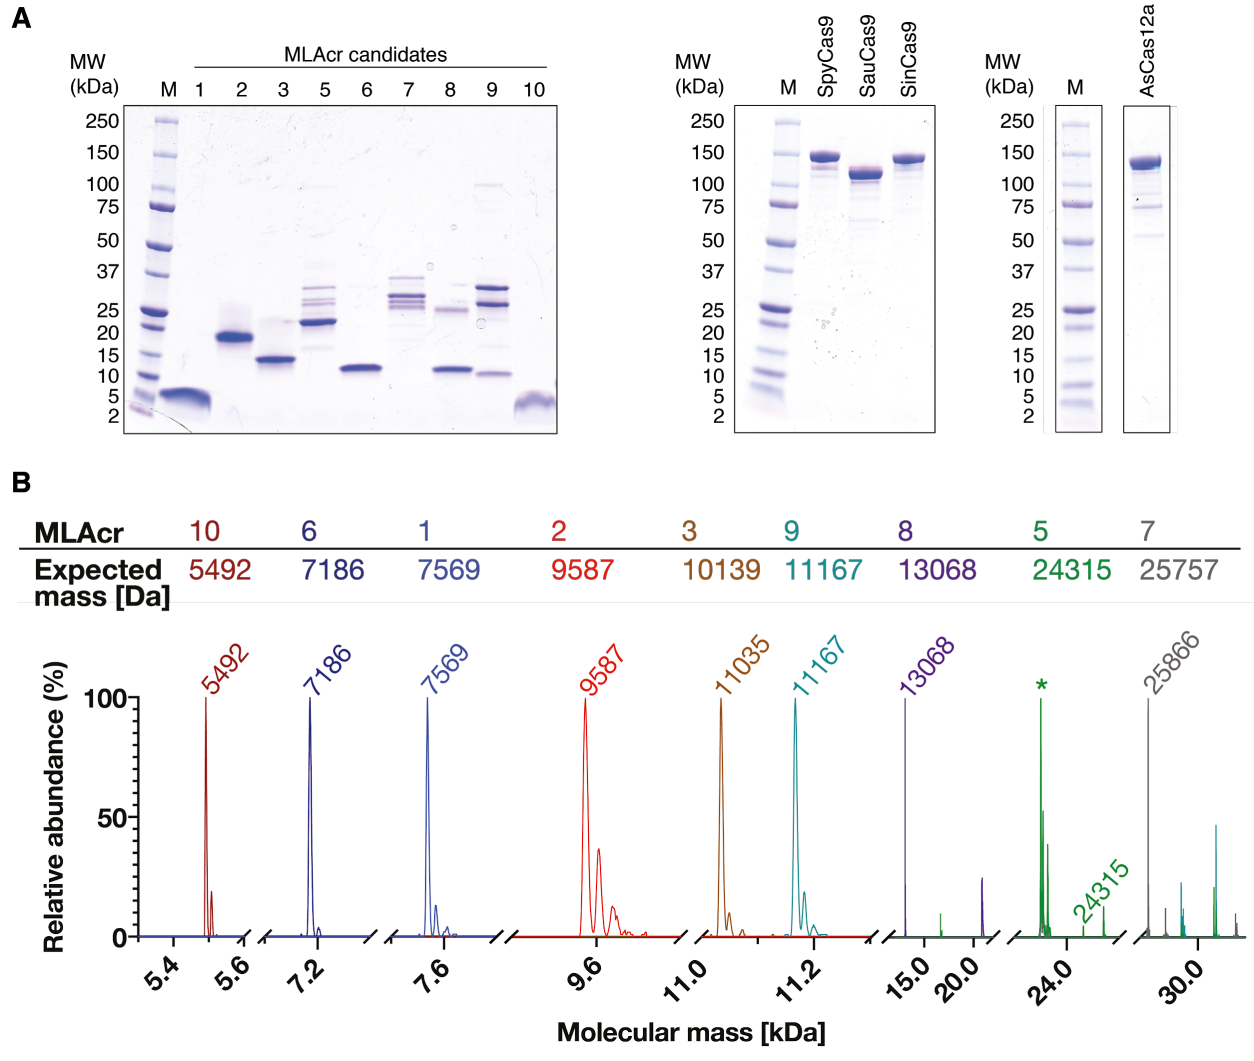

**Figure S2. Purified Acr candidates and Cas effectors used in this study.** (A) 4-20% gradient SDS-PAGE showing a size marker (M) and (left to right) purified machine learning Acr candidates, Cas9 effectors and AsCas12a used in this study. (B) Mass spectra of each purified Acr candidate used in this study. The measured mass of ML3 is 896 Da higher than the expected mass. We did not investigate the mass difference any further. ML5 contained a significant unidentified contaminant (\*) of 23,510 Da in size.

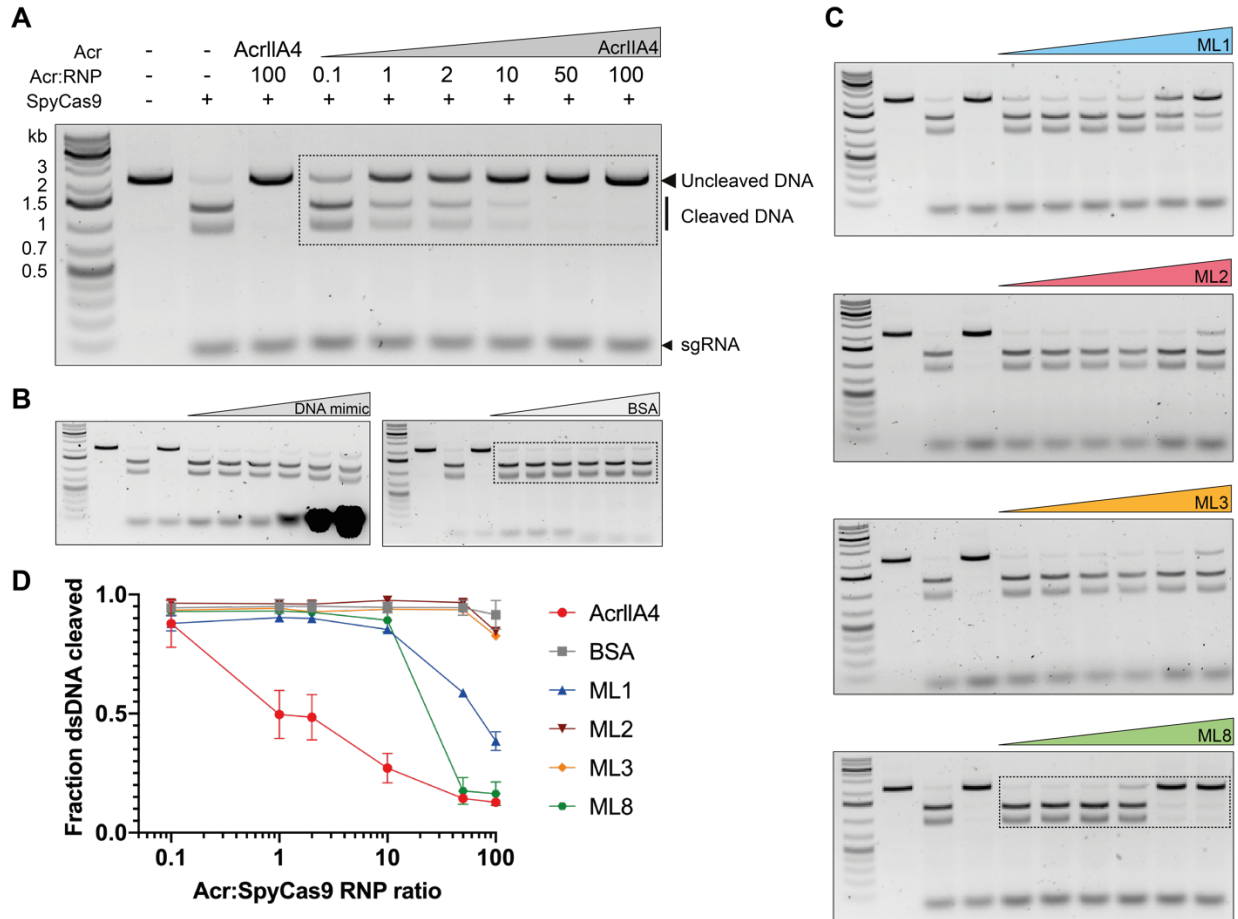

**Figure S3. Inhibition of SpyCas9 by newly discovered Acr candidates.** (A) *In vitro* cleavage of dsDNA by SpyCas9 in the presence of increasing concentrations of AcrIIA4 (positive control). (B) *In vitro* cleavage of dsDNA by SpyCas9 in the presence of increasing concentrations of (left) DNA mimic and (right) BSA (DNA or BSA:RNP 0.1-, 1-, 2-, 10-, 50- and 100-fold excess from left to right). (C) *In vitro* cleavage of dsDNA by SpyCas9 in the presence of increasing concentrations of ML1, ML2, ML3 and ML8 (Acr:RNP 0.1-, 1-, 2-, 10-, 50- and 100-fold excess from left to right). (D) Quantified band intensities of the *in vitro* cleavage assays. Fraction of dsDNA cleaved (y-axis) is plotted against the Acr to SpyCas9 RNP ratio (x-axis). AcrIIA4, BSA, ML1 and ML8 were run in triplicates.

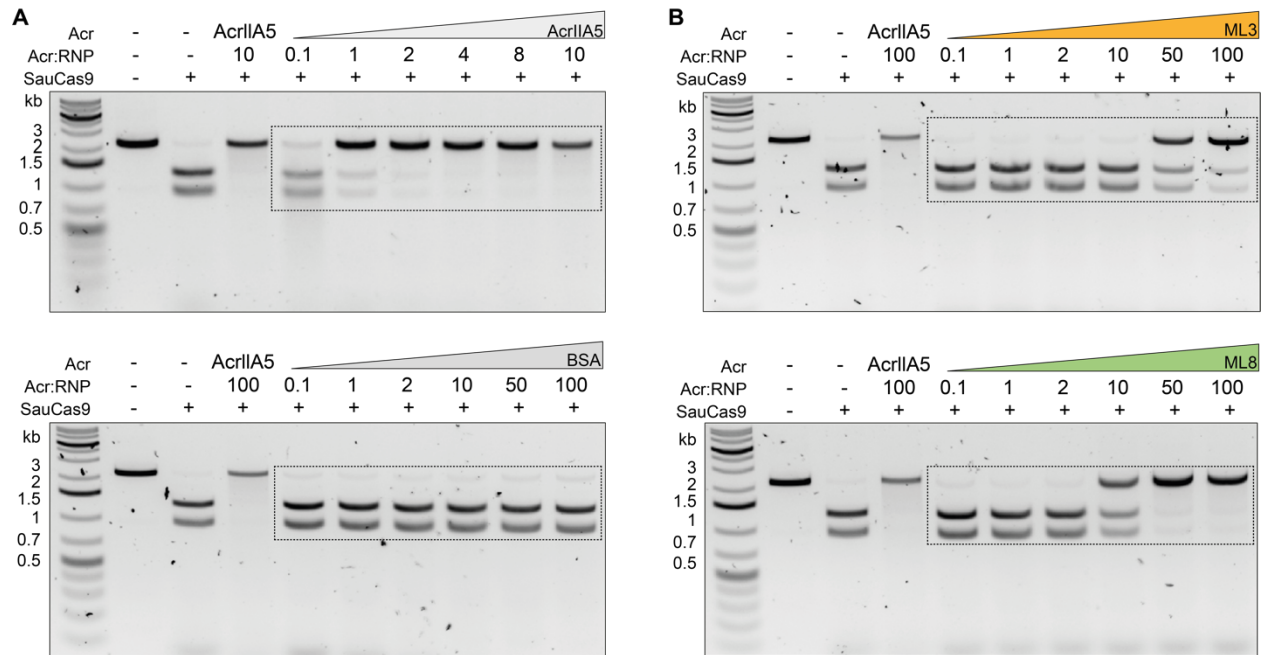

**Figure S4. Inhibition of SauCas9 by newly discovered Acr candidates.** (A) *In vitro* cleavage of dsDNA by SauCas9 in the presence of increasing concentrations of the positive control AcrIIA5 (top) or negative control BSA (bottom). (B) *In vitro* cleavage of dsDNA by SauCas9 in the presence of increasing concentrations of ML3 (top) and ML8 (bottom).

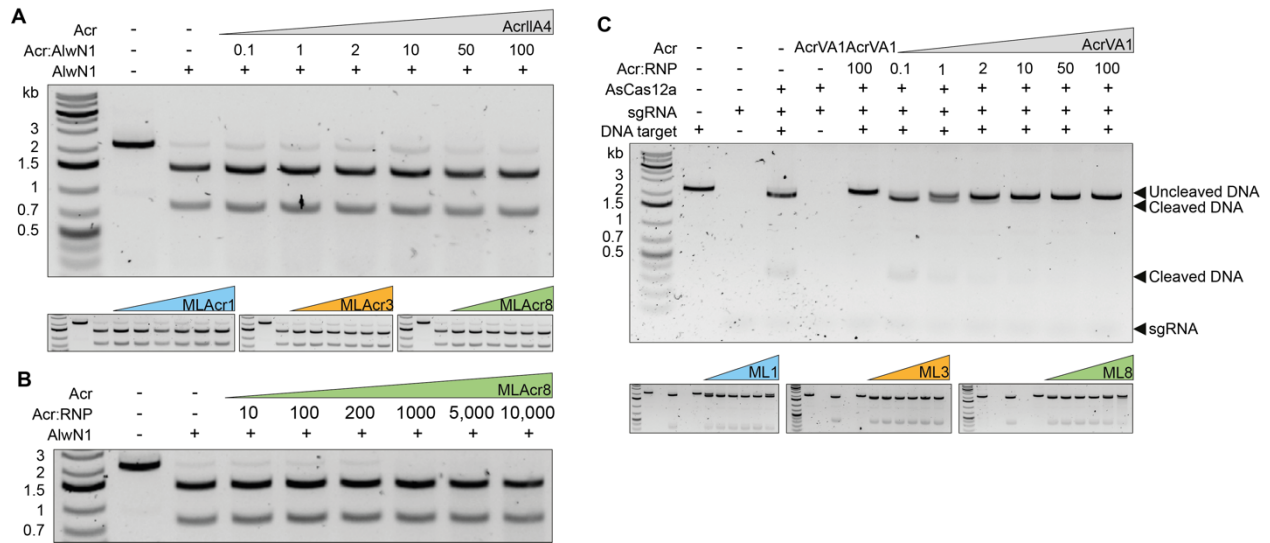

**Figure S5. Control experiments for *in vitro* dsDNA cleavage assay.** (A) *In vitro* cleavage of dsDNA by the restriction enzyme AlwN1 in the absence or presence of increasing concentrations of AcrIIA4, ML1, ML3 and ML8 (Acr:AlwN1 0.1-, 1-, 2-, 10-, 50- and 100-fold excess from left to right). (B) *In vitro* cleavage of dsDNA by the restriction enzyme AlwN1 in the presence of increasing concentrations of ML8. (C) *In vitro* cleavage of dsDNA by AsCas12a in the absence or presence of increasing concentrations of AcrVA1, ML1, ML3 and ML8 (Acr:RNP 0.1-, 1-, 2-, 10-, 50- and 100-fold excess from left to right).

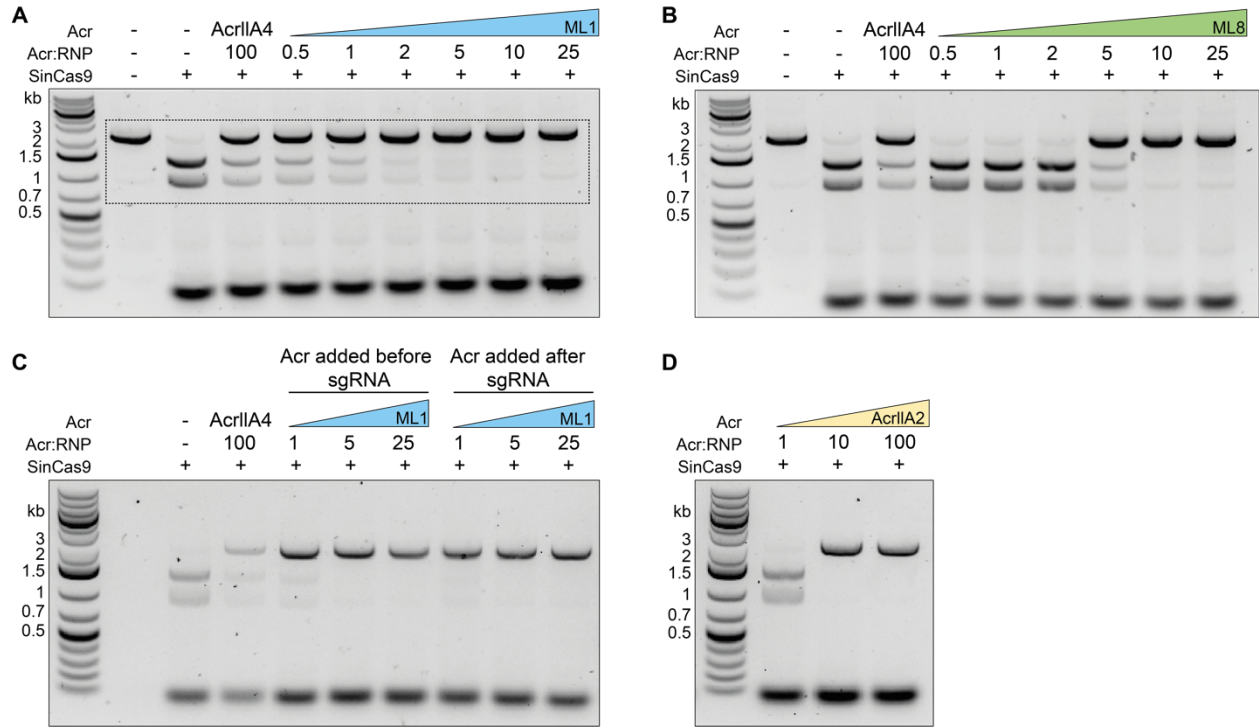

**Figure S6. Inhibition of SinCas9 by ML1, ML8 and AcrIIA2.** (A) *In vitro* cleavage of dsDNA by SinCas9 in the absence or presence of increasing concentrations of ML1. (B) *In vitro* cleavage of dsDNA by SinCas9 in the absence or presence of increasing concentrations of ML8. (C) *In vitro* cleavage assay where ML1 is incubated with SinCas9 before and after the incubation with sgRNA. (D) *In vitro* cleavage of dsDNA by SinCas9 in the presence of increasing concentrations of AcrIIA2. The same DNA target is used in all gels.





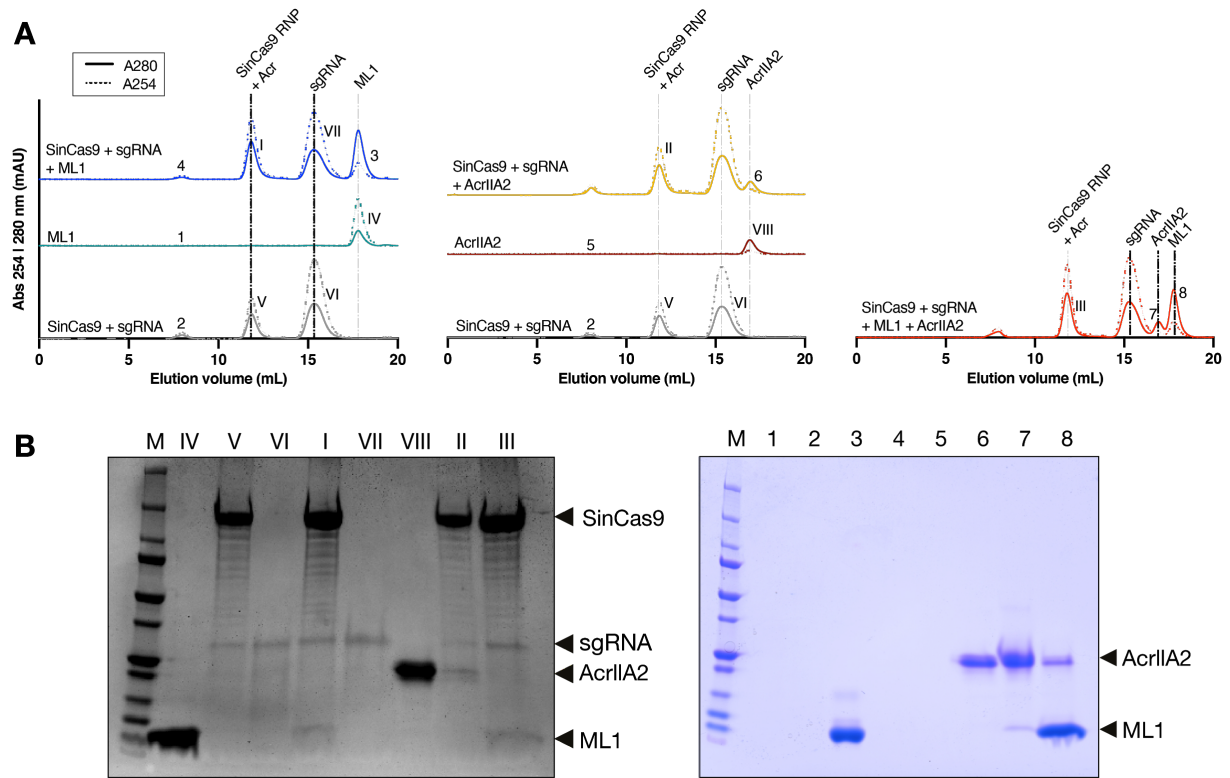

**Figure S8. Competition binding experiment between ML1 and AcrIIA2.** (A) Size-exclusion chromatogram of SinCas9-sgRNA in the absence or presence of ML1 (left), AcrIIA2 (middle) or both (right). (B) Coomassie-stained polyacrylamide gel illustrating the components of the fractions annotated with (I) to (VI) and 1 to 8 in panel (A).

**Table S1. List of Acrs used for training and cross-validation of the AcRanker model.**

| <b>Anti-CRISPRdb Name</b> | <b>Acr Family</b> | <b>Protein Accession #</b> | <b>Species</b>                                                                          | <b>Proteome Size</b> | <b>Ref</b> |
|---------------------------|-------------------|----------------------------|-----------------------------------------------------------------------------------------|----------------------|------------|
| anti_CRISPR0407           | AcrIE1            | YP_007392738.1             | <i>Pseudomonas</i> phage JBD5                                                           | 57                   | (3)        |
| anti_CRISPR0408           | AcrIE3            | YP_950454.1                | <i>Pseudomonas</i> phage DMS3                                                           | 52                   | (3)        |
| anti_CRISPR0409           | AcrIE2            | YP_007392439.1             | <i>Pseudomonas</i> phage JBD88a                                                         | 54                   | (3)        |
| anti_CRISPR0410           | AcrIE4            | NP_938238.1                | <i>Pseudomonas</i> phage D3112                                                          | 54                   | (3)        |
| anti_CRISPR0001           | AcrIF1            | YP_007392342.1             | <i>Pseudomonas</i> phage JBD30                                                          | 56                   | (4)        |
| anti_CRISPR0007           | AcrIF2            | YP_002332454.1             | <i>Pseudomonas</i> phage MP29                                                           | 51                   | (4)        |
| anti_CRISPR0003           | AcrIF3            | YP_007392440.1             | <i>Pseudomonas</i> phage JBD88a                                                         | 54                   | (4)        |
| anti_CRISPR0002           | AcrIF4            | YP_007392799.1             | <i>Pseudomonas</i> phage JBD24                                                          | 57                   | (4)        |
| anti_CRISPR0005           | AcrIF5            | YP_007392740.1             | <i>Pseudomonas</i> phage JBD5                                                           | 57                   | (4)        |
| anti_CRISPR0008           | AcrIF6            | WP_043884810.1             | <i>Pseudomonas aeruginosa</i>                                                           | 6095                 | (5)        |
| anti_CRISPR0011           | AcrIF6            | WP_019933870.1             | <i>Oceanimonas smirnovii</i>                                                            | 3045                 | (5)        |
| anti_CRISPR0013           | AcrIF6            | WP_014702809.1             | <i>Methylophaga frappieri</i>                                                           | 2689                 | (5)        |
| anti_CRISPR0022           | AcrIF7            | ACD38920.1                 | <i>Pseudomonas aeruginosa</i> strain PACS458 clone fa1376 <i>Pseudomonas aeruginosa</i> | 57                   | (5)        |
| anti_CRISPR0034           | AcrIF8            | AFC22483.1                 | <i>Pectobacterium</i> phage ZF40                                                        | 68                   | (5)        |
| anti_CRISPR0038           | AcrIF9            | WP_031500045.1             | <i>Vibrio parahaemolyticus</i>                                                          | 4928                 | (5)        |
| anti_CRISPR0051           | AcrIF10           | KEK29119.1                 | <i>Shewanella xiamenensis</i>                                                           | 3552                 | (5)        |
| anti_CRISPR0134           | AcrIIA1           | AEO04364.1                 | <i>Listeria monocytogenes</i> J0161                                                     | 2952                 | (6)        |
| anti_CRISPR0246           | AcrIIA2           | AEO04363.1                 | <i>Listeria monocytogenes</i> J0161                                                     | 2952                 | (6)        |
| anti_CRISPR0384           | AcrIIA4           | AEO04689.1                 | <i>Listeria monocytogenes</i> J0161                                                     | 2952                 | (6)        |
| anti_CRISPR0433           | AcrIIA5           | D4276_028                  | <i>Streptococcus</i> phage D4276                                                        | 54                   | (7)        |

**Table S2. List of Acrs used for independent testing of AcRanker.**

| <b>Acr Family</b> | <b>Protein Accession</b> | <b>Species</b>                                               | <b>Proteome Size</b> | <b>Ref</b> |
|-------------------|--------------------------|--------------------------------------------------------------|----------------------|------------|
| AcrIE5            | WP_074973300.1           | <i>Pseudomonas otitidis</i> strain DSM 17224                 | 5731                 | (8)        |
| AcrIE6            | WP_087937214.1           | <i>Pseudomonas aeruginosa</i> strain S708_C14_RS             | 6794                 | (8)        |
| AcrIE7            | WP_087937215.1           | <i>Pseudomonas aeruginosa</i> strain S708_C14_RS             | 6794                 | (8)        |
| AcrIE4-F7         | WP_064584002.1           | <i>Pseudomonas citronellolis</i> strain SJTE-3               | 6260                 | (8)        |
| AcrIF11           | WP_038819808.1           | <i>Pseudomonas aeruginosa</i> str. C1426                     | 5888                 | (8)        |
| AcrIF11.1         | WP_033936089.1           | <i>Pseudomonas aeruginosa</i> strain TRN6649                 | 6373                 | (8)        |
| AcrIF11.2         | EGE18857.1               | <i>Moraxella catarrhalis</i> BC8                             | 1844                 | (8)        |
| AcrIF12           | ABR13388.1               | <i>Pseudomonas aeruginosa</i> PAGI-5 genomic island sequence | 121                  | (8)        |
| AcrIF13           | EGE18854.1               | <i>Moraxella catarrhalis</i> BC8                             | 1843                 | (8)        |
| AcrIF14           | AKI27193.1               | <i>Moraxella</i> phage Mcat5                                 | 68                   | (8)        |
| AcrIC1            | WP_046701304.1           | <i>Moraxella bovoculi</i> strain 58069                       | 1944                 | (8)        |
| AcrIIA3           | WP_014930691.1           | <i>Listeria monocytogenes</i> serotype 7 str. SLCC2482       | 2822                 | (6)        |
| AcrIIA6           | WP_149028791.1           | <i>Streptococcus</i> phage D1811                             | 40                   | (9)        |
| AcrIIA7           | AII65827.1               | <i>Bacteroides dorei</i> isolate HSI_L_1_B_010               | 4519                 | (10)       |
| AcrIIA9           | WP_004289410.1           | <i>Bacteroides fragilis</i> strain DCMOUH0067B               | 4286                 | (10)       |
| AcrIIA13          | AKS70260.1               | <i>Staphylococcus schleiferi</i> strain 5909-02              | 2278                 | (11)       |
| AcrIIC5           | WP_002642161.1           | <i>Simonsiella muelleri</i> ATCC 29453                       | 2170                 | (12)       |
| AcrIIIB1          | NP_666582.1              | <i>Sulfolobus islandicus</i> rod-shaped virus 2              | 54                   | (13)       |
| AcrVA1            | WP_046701302.1           | <i>Moraxella bovoculi</i> strain 58069                       | 1944                 | (8, 14)    |
| AcrVA4            | WP_046699156.1           | <i>Moraxella bovoculi</i> strain 22581                       | 2105                 | (14)       |

**Table S3. Grouping of amino acids based on physiochemical properties.** Groups of amino acids with similar side chains are grouped together to reduce the number of features to test in the machine learning model (2).

| <b>Group #</b> | <b>Dipole Scale<sup>a</sup></b>              | <b>Volume Scale<sup>b</sup></b> | <b>Amino Acids</b> |
|----------------|----------------------------------------------|---------------------------------|--------------------|
| 1              | -                                            | -                               | A, G, V            |
| 2              | -                                            | +                               | I, L, F, P         |
| 3              | +                                            | +                               | Y, M, T, S         |
| 4              | ++                                           | +                               | H, N, Q, W         |
| 5              | +++                                          | +                               | R, K               |
| 6              | + <sup>1</sup> + <sup>1</sup> + <sup>1</sup> | +                               | D, E               |
| 7              | + <sup>c</sup>                               | +                               | C                  |

<sup>a</sup>Dipole scale (Debye): -, Dipole < 1.0; +, 1.0 < Dipole < 2.0; ++, 2.0 < Dipole < 3.0; +++, Dipole > 3.0; +<sup>1</sup>+<sup>1</sup>+<sup>1</sup>, Dipole > 3.0 with opposite orientation

<sup>b</sup>Volume scale (Å<sup>3</sup>): -, Volume < 50; +, Volume > 50

<sup>c</sup>Cysteine is separated from class 3 because of its ability to form disulfide bonds

**Table S4. Comparison of XGBoost classification vs. pairwise ranking models during leave-one-out cross-validation.** Each row of the table indicates which Acr was excluded from the training dataset and used as a test dataset, with the number indicating the rank obtained using either a blastp search against all other known Acrs in the training set (blastp), an XGBoost classification model (Class.), an XGBoost pairwise ranking model (Ranking). The best rank achieved by the XGBoost classification or pairwise ranking model within the complete or prophage proteome is marked with an asterisk. The best rank between blastp and either XGBoost model is bolded, and any method that produces the top rank is bolded with two asterisks. The pairwise ranking model performs better than the classification model, with the ranking model receiving a better rank 11 times vs. six times for the classification model in complete bacterial or phage proteomes. In the smaller prophage proteomes the ranking model is ranked higher five times vs. once for the classification model.

| Protein         | Acr Family | Complete Proteome |            |                    |             | Prophage Proteome Subset |            |                    |            |
|-----------------|------------|-------------------|------------|--------------------|-------------|--------------------------|------------|--------------------|------------|
|                 |            | Size              | blastp     | AcRanker (XGBoost) |             | Size                     | blastp     | AcRanker (XGBoost) |            |
|                 |            |                   |            | Class.             | Ranking     |                          |            | Class.             | Ranking    |
| anti_CRISPR0407 | AcrIE1     | 57                | 33         | 9                  | <b>1**</b>  |                          |            |                    |            |
| anti_CRISPR0408 | AcrIE3     | 52                | 17         | <b>1**</b>         | <b>1**</b>  |                          |            |                    |            |
| anti_CRISPR0409 | AcrIE2     | 54                | 18         | 5                  | <b>2*</b>   |                          |            |                    |            |
| anti_CRISPR0410 | AcrIE4     | 54                | 11         | 2                  | <b>1**</b>  |                          |            |                    |            |
| anti_CRISPR0001 | AcrIF1     | 56                | 21         | <b>4*</b>          | 11          |                          |            |                    |            |
| anti_CRISPR0007 | AcrIF2     | 51                | 34         | <b>1**</b>         | <b>1**</b>  |                          |            |                    |            |
| anti_CRISPR0003 | AcrIF3     | 54                | 5          | 9                  | <b>1**</b>  |                          |            |                    |            |
| anti_CRISPR0002 | AcrIF4     | 57                | 36         | <b>1**</b>         | 3           |                          |            |                    |            |
| anti_CRISPR0005 | AcrIF5     | 57                | 26         | <b>19*</b>         | <b>19*</b>  |                          |            |                    |            |
| anti_CRISPR0008 | AcrIF6     | 6095              | <b>1**</b> | 69*                | 80          | 361                      | <b>1**</b> | 17                 | 15*        |
| anti_CRISPR0011 | AcrIF6     | 3045              | <b>1**</b> | 25                 | 13*         | 72                       | <b>1**</b> | 3                  | <b>1**</b> |
| anti_CRISPR0013 | AcrIF6     | 2689              | <b>1**</b> | 541                | 130*        | 57                       | -          | -                  | -          |
| anti_CRISPR0022 | AcrIF7     | 57                | 20         | 3                  | <b>1**</b>  |                          |            |                    |            |
| anti_CRISPR0034 | AcrIF8     | 68                | 30         | 3                  | <b>1**</b>  |                          |            |                    |            |
| anti_CRISPR0038 | AcrIF9     | 4928              | 198        | <b>44*</b>         | 333         | 37                       | -          | -                  | -          |
| anti_CRISPR0051 | AcrIF10    | 3552              | 189        | <b>2*</b>          | 17          | 70                       | 23         | <b>1**</b>         | 2          |
| anti_CRISPR0134 | AcrIIA1    | 2951              | 183        | 931                | <b>770*</b> | 146                      | <b>60</b>  | 97                 | 87*        |
| anti_CRISPR0246 | AcrIIA2    | 2952              | 210        | 15*                | 16          | 146                      | 34         | 6                  | <b>3*</b>  |
| anti_CRISPR0384 | AcrIIA4    | 2951              | 59         | 56                 | <b>21*</b>  | 146                      | 9          | 15                 | <b>4*</b>  |
| anti_CRISPR0433 | AcrIIA5    | 54                | <b>5</b>   | 12                 | <b>8*</b>   |                          |            |                    |            |

**Table S5. Amino acid sequence and accession numbers of all the Acr candidates.**

| #ML cand. | Accession No.  | Sequence                                                                                                                                                                                                                         |
|-----------|----------------|----------------------------------------------------------------------------------------------------------------------------------------------------------------------------------------------------------------------------------|
| ML1       | OHX26873.1     | MKNYEVTNEVKNLNTQVETIGQAVDLYKEYGSNTIVWSIDK<br>NEDLIDEVTELVAEYAEKGTVIK                                                                                                                                                             |
| ML2       | WP_003731277.1 | MGKTYWYNEGTDLLTEKEYKELMEREAKALYEEVQEEEKD<br>FESSEKTSFEEFLKTCYENESDFVLSNENGNKLEEW                                                                                                                                                 |
| ML3       | WP_003731276.1 | MSKTMYKNDVIELIKNAKTNNEELLFTSVERNTREAATQYFR<br>CPEKHVSDAGVYYGEDFEFDGFEIFEDDLIYTRSVDKEELN                                                                                                                                          |
| ML4       | WP_000946250.1 | MLRRVNHVKNVLAHGFEAEWIENKIGIHYREANRMMTVAKQ<br>IPNVSTLKYLGATAKHVNGVAKRKQNFLSQISLIPTNPQLPHQ<br>TIINTYLYWQP                                                                                                                          |
| ML5       | WP_001080841.1 | MNRLKELRKEKLTQEELAGEIGVSKITILRWENGERQIKPDK<br>AKELAKYFNVSVGYLLGYAPNKKIDFQLNLDGTTLHLTKEQF<br>LALENTSKSIIKIKNTINESVKQEEYIKNASKYYDFEKVSRRLT<br>DRLFEIHTDLIELLMMLDHFPSGELSKSQEAIKFKYKQLDYFV<br>TDTPASFDYFKKNLESYGYKIYTEGDKIDFD       |
| ML6       | WP_000965633.1 | MLYIDEFKEAIDKGYILGGTVAIVRKNKGFIDYVLPHEEVREE<br>EVVTVERVEDVMRELE                                                                                                                                                                  |
| ML7       | WP_000591144.1 | MIKIYFGKDAALNQAIQSRLDSYQIDYQAFSSKDIDAKTLMEW<br>LFKSTDIFELLSTKMLKYKLNTQITLSQFVRKILKDVNSTLKLPI<br>VVTDEVIYSNMSPDYVTVLLPKEYRKIKRIQLMRKMEQLDEG<br>RLFWKNFELFRKQSELRWFELNELLFADVSDDLGEIKKAKDR<br>FFSYKKNQVPPNEIIRILKIFLVDREDFKSPDLQNF |
| ML8       | WP_000384271.1 | MDYDNENYLIPKILLQDDFYSSLSAKDILVYAVLKDRQIEALE<br>KGWIDTDGSIYLNFKLIELAKMFCSRRTMIDVMQRLEEVLNI<br>ERERVDVFGYSLPYKTYINEV                                                                                                               |
| ML9       | WP_000134666.1 | MTEGFTIQLPKVTEKKLLARYDDMLQKAIEKALEDKELYKPI<br>VRMAGLCRWLDVSTTTVVKWQKQGGMPHMVIDGVTLYDK<br>HKVAQWLQQFER                                                                                                                            |
| ML10      | WP_011058321.1 | MNIEDIERIISEYLIFRSIDIDGCAVIDIEDFLKHIRFSYERLK                                                                                                                                                                                     |

**Table S6. Amino acid sequence of all the Cas effectors used in this study.**

| Cas effector | Species                       | Sequence                                                                                                                                                                                                                                                                                                                                                                                                                                                                                                                                                                                                                                                                                                                                                                                                                                                                                                                                                                                                                                                                                                                                                                                                                                                                                                                                                                                                                                                                                                                      |
|--------------|-------------------------------|-------------------------------------------------------------------------------------------------------------------------------------------------------------------------------------------------------------------------------------------------------------------------------------------------------------------------------------------------------------------------------------------------------------------------------------------------------------------------------------------------------------------------------------------------------------------------------------------------------------------------------------------------------------------------------------------------------------------------------------------------------------------------------------------------------------------------------------------------------------------------------------------------------------------------------------------------------------------------------------------------------------------------------------------------------------------------------------------------------------------------------------------------------------------------------------------------------------------------------------------------------------------------------------------------------------------------------------------------------------------------------------------------------------------------------------------------------------------------------------------------------------------------------|
| Cas9         | <i>Streptococcus pyogenes</i> | MDKKYSIGLDIGTNSVGWAVITDEYKVPSKKFKVLGNTDRHSIK<br>KNLIGALLFDSGETAEATRLKRTARRRYTRRKNRICYLQEIFSNE<br>MAKVDDSFHRLLESFLVEEDKKHERHPIFGNIVDEVAYHEKYP<br>TIYHLRKKLVDSTDKADLRLIYLALAHMIKFRGHFLIEGDLNPDN<br>SDVDKLFIQLVQTYNQLFEENPINASGVDAKAILSARLSKSRRLE<br>NLIAQLPGEKKNGLFGNLIASLGLTPNFKSNFDLAEDAQLQSK<br>DTYDDDLNLLAQIGDQYADLFLAAKNLSAAILSDILRVNTEIT<br>KAPLSASMIKRYDEHHQDLTLLKALVRQQLPEKYKEIFFDQSKN<br>GYAGYIDGGASQEEFYKFIKPILEKMDGTEELLVKLNREDLLRK<br>QRTFDNGSIPHQIHLGELHAILRRQEDFYFPLKDNREKIEKILTFRI<br>PYYVGPLARGNSRFAWMTRKSEEITIPWNFEEVVDKGASAQFSI<br>ERMTNFDKNLPNEKVLPHSLLYEYFTVYNELTKVKYVTEGMR<br>KPAFLSGEQKKAIVDLLFKTNRKVTVKQLKEDYFKKIECFDSVEI<br>SGVEDRFNASLGTYHDLKIIKDKDFLDNEENEDILEDIVLTLTLF<br>EDREMIEERLKYAHLFDDKVMKQLKRRRYTGWGRLSRKLINGI<br>RDKQSGKTILDFLKSDFANRNFQMQLIHDDSLTFKEDIQKAQVS<br>GQGDSLHEHIANLAGSPAIKKILQTVKVVDELVKVMGRHKPEN<br>IVIAMARENQTTQKGQKNSRERMKRIEELGKELGSQILKEHPVEN<br>TQLQNEKLYLYLQNGRDMYVDQELDINRLSDYDVDHIVPQSF<br>LKDDSIDNKVLTRSDKNRGKSDNVPSEEVVKKMKNYWRQLLN<br>AKLITQRKFDNLTKAERGGLSELDKAGFIKRQLVETRQITKHVA<br>QILDSRMNTKYDENDKLIREVKVITLKSCLVSDFRKDFQFYKVR<br>EINNYHHAHDAYLNAVVGTAIHKYKLESEFVYGDYKVYDVR<br>KMIKSEQEIGKATAKYFFYSNIMNFFKTEITLANGEIRKRPLIET<br>NGETGEIVWDKGRDFATVRKVLSPQVNIKKTEVQTGGFSKE<br>SILPKRNSDKLIARKKDWDPKKYGGFDSPTVAYSVLVVAKVEKG<br>KSKKLKSVKELLGITIMERSSEKPNIDFLEAKGYKEVKKDLIHL<br>PKYSLFELENGRKRMLASAGELQKGNELALPSKYVNFLYLASHY<br>EKLKGSPEDEQKQLFVEQHKHYLDEIIEQISEFSKRIVLADANL<br>DKVLSAYNKHRDKPIREQAENIHLFTLTNLGAPAAFKYFDTTID<br>RKRYTSTKEVLDTLIHQSIITGLYETRIDLSQLGGD |
| Cas9         | <i>Staphylococcus aureus</i>  | MGKRNYILGLDIGITSVGYGIIDYETRDVIDAGVRLFKEANVENN<br>EGRRSKRGARRLKRRRRRHRIQRVKKLLFDYNLLTDHSELGINP                                                                                                                                                                                                                                                                                                                                                                                                                                                                                                                                                                                                                                                                                                                                                                                                                                                                                                                                                                                                                                                                                                                                                                                                                                                                                                                                                                                                                                 |

|      |                            |                                                                                                                                                                                                                                                                                                                                                                                                                                                                                                                                                                                                                                                                                                                                                                                                                                                                                                                                                                                                                                                                                                                             |
|------|----------------------------|-----------------------------------------------------------------------------------------------------------------------------------------------------------------------------------------------------------------------------------------------------------------------------------------------------------------------------------------------------------------------------------------------------------------------------------------------------------------------------------------------------------------------------------------------------------------------------------------------------------------------------------------------------------------------------------------------------------------------------------------------------------------------------------------------------------------------------------------------------------------------------------------------------------------------------------------------------------------------------------------------------------------------------------------------------------------------------------------------------------------------------|
|      |                            | <p> YEARVKGLSQKLSEEEFSAALLHLAKRRGVHNVNEVEEDTGNE<br/> LSTKEQISRNSKALEEKYVAELQLERLKKDGEVRGSINRFKTSDY<br/> VKEAKQLLKVQKAYHQLDQSFIDTYIDLLETRRYYEGPGEGSP<br/> FGWKDIKEWYEMLMGHCTYFPEELRSVKYAYNADLYNALNDL<br/> NNLVITRDENEKLEYEYKQIENVFKQKKKPTLKQIAKEILVNEE<br/> DIKGYRVTSTGKPEFTNLKVYHDIKDITARKEIENAELLDQIAKI<br/> LTIQSSEDIQEELTNLNSLTQEEIEQISNLKGYTGTHNLSLKAIN<br/> LILDELWHTNDNQIAIFNRLKLVKKVDLSQQKEIPTTLVDDFILS<br/> PVVKRSFIQSIKVINAIKKYGLPNDIIEELAREKNSKDAQKMINEM<br/> QKRNRQTNERIEEIIRTTGKENAKYLIEKIKLHDMQEGKCLYSLE<br/> AIPLEDLLNPNFNYEVDHIIPRSVSFDNSFNKVLVKQEENSCKG<br/> NRTPFQYLSSSDSKISYETFKKHILNLAAGKGRISKTKKEYLLEER<br/> DINRFSVQKDFINRNLVDTRYATRGLMNLLRSYFRVNNLDVKVK<br/> SINGGFTSFLRRKWKFKKERNKGYKHAEDALIINANADFIFKEW<br/> KKLDKAKKVMENQMFEEKQAESMPEIETEQEYKEIFITPHQIKHI<br/> KDFKDYKYSHRVDKKNRELINDTLYSTRKDDKGNLIVNNLN<br/> GLYDKDNDKLLKLINKSPEKLLMYHHPQTYQKLKLIMEQYGD<br/> EKNPLYKYEEETGNYLTKYSKKNPVIKKIKYYGNKLNALHDI<br/> TDDYPNSRNKVVKLSLKPYPFDVYLDNGVYKFVTVKNLDVIKK<br/> ENYYEVNSKCYEEAKLKKISNQAEFIASFYNNDLIKINGELYRV<br/> IGVNNDLLNRIEVMIDITYREYLENMNDKRPPIIKTIASKTQSI<br/> KKYSTDILGNLYEVKSKKHPQIIKKG </p> |
| Cas9 | <i>Streptococcus iniae</i> | <p> MRKPYSIGLDIGTNSVGWAVITDDYKVPSKMKRIQGTDDRTSIK<br/> KNLIGALLFDNGETAEATRLKRTTRRRYTRRKYRIKELQKIFSSE<br/> MNELDIAFFPRLSESFLVSDDKEFENHPIFGNLKDEITYHNDYPTI<br/> YHLRQTLADRQKADLRLIYLALAHIIKFRGHFLIEGNLDSNTD<br/> VHVLFLNLVNIYNNLFEEDIVETASIDAEEKILTSKTSKSRLENLIA<br/> EIPNQKRNLFGNLVSLALGLTPNFKTNFELLEDAKLQISKDSYE<br/> EDLDNLLAQIGDQYADLFIAAKKLSDAILLSDIITVKGASTKAPLS<br/> ASMVQRYEEHQQLALLKNLVKKQIPEKYKEIFDNKEKNGYAG<br/> YIDGKTSQEEFYKYIKPILLKLNKTEKLISKLEREDFLRKQRTFDN<br/> GSIPHQIHLNELKAIIRRQEKFYFPLKENQKIEKLFTEKIPYYVGP<br/> LANGQSSFAWLKRQSNESITPWNFEEVVDQEASARAFIERMTNF<br/> DTYLPPEEKVLPKHSPLYEMFMVYNELTKVKYQTEGMKRPVFLS<br/> SEDKEEIVNLLFKKDRKVTVKQLKEEYFSKMKCFHTVTILGVED<br/> RFNASLGTYHDLLKIFKDKAFLDDEANQDILEEIVWTLTLFEDQA </p>                                                                                                                                                                                                                                                                                                                                                                                   |



|        |                            |                                                                                                                                                                                                                                                                                                                                                                                                                                                                                                                                                                                                                                                                                                                                                                                                                                                                                                                                                                                               |
|--------|----------------------------|-----------------------------------------------------------------------------------------------------------------------------------------------------------------------------------------------------------------------------------------------------------------------------------------------------------------------------------------------------------------------------------------------------------------------------------------------------------------------------------------------------------------------------------------------------------------------------------------------------------------------------------------------------------------------------------------------------------------------------------------------------------------------------------------------------------------------------------------------------------------------------------------------------------------------------------------------------------------------------------------------|
|        |                            | <p>MIERRLVKYADVFEKSVLKKLKKRHYTGWGRLSQKLINGIKDK<br/> QTGKTILGFLKDDGVANRNFMLINDSSLDFAKIKHEQEKTIKN<br/> ESLEETIANLAGSPAIKKGILQSIKIVDEIVKIMGQNPDNIVIMAR<br/> ENQSTMQGIKNSRQRLRKLEEVHKNTGSKILKEYNVSNTQLQSD<br/> RLYLILLQDGKDMYTGKELDYDNLQSYDIDHIIPQSFIDNSIDN<br/> IVLTTQASNRGKSDNVPNIEIVNKMKSFWYKQLKNGAISQRKFD<br/> HLTKAERGALSDFDKAGFIKRQLVETRQITKHVAQILDSRFNSNL<br/> TEDSKSNRNVKIITLKSKMVSDFRKDFGFYKLREVNDYHHAQDA<br/> YLNNAVGTALLKKYPKLEAEFVYGDYKHYDLAKLMIQPSSLG<br/> KATTRMFFYSNLMNFFKKEIKLADDTIFTRPQIEVNTETGEIVWD<br/> KVKDMQTIRKVMSPQVNVIMKTEVQTGGFSKESILPKGNSDKL<br/> IARKKSWDPKKGFFDSPIIAYSVLVVAKIAKGTQKLTIKELV<br/> GIKIMEQDEFEKDPIAFLEKKGYQDIQTSSIIKLPKYSLFELENGRK<br/> RLASAKELQKGNELALPNKYVKFLYLASHYTKFTGKEEDREK<br/> KRSYVESHLVYFDEIMQIIVEYSNRYILADSNLIQNLKKEKDNF<br/> SIEEQAINMLNLFTFTDLGAPAAFKFFNGDIDRKRYSSTNEIINSTL<br/> IYQSPTGLYETRIDLKLGKK</p>                                                                                                                                  |
| Cas12a | <i>Acidaminococcus sp.</i> | <p>MTQFEGFTNLYQVSKTLRFELIPQGKTLKHIQEQQFIEEDKARND<br/> HYKELKPIIDRIYKTYADQCLQLVQLDWNLSAIDSRYRKEKTEE<br/> TRNALIEEQATYRNAIHDIYFIGRTDNLTDANKRHAIEYKGLFKA<br/> ELFNGKVLKQLGTVTTTEHENALLRSFDKFTTYFSGFYENRKNV<br/> FSAEDISTAIPHRIVQDNFPKFKENCHIFTRLITAVPSLREHFENVK<br/> KAIGIFVSTSIEEVFSFPFYNQLLTQTQIDLYNQLLGGISREAGTEK<br/> IKGLNEVLNLAIQKNDETAHIIASLPHRFIPLFKQILSDRNTLSFILE<br/> EFKSDEEVIQSFCKYKTLRNENVLETAEALFNELNSIDLTHIFISH<br/> KKLETISSALCDHWDTLRNALYERRISELTGKITKSAKEKVQRSL<br/> KHEDINLQEIISAAGKELSEAFKQKTSEILSHAHAALDQPLPTLK<br/> KQEEKEILKSQDSSLGLYHLLDWFVAVDESNEVDPEFSARLTGK<br/> LEMPSLSFYNKARNYATKKPYSVEKFKLNFQMPTLASGWDVN<br/> KEKNNGAILFVKNGLYYLGIMPKQKGRYKALSFEPTSEKTFD<br/> KMYDYFPDAAKMIPKCSTQLKAVTAHFQTHTPILLSNFIPL<br/> EITKEIYDLNPEKEPKKFTAYAKKTGDQKGYREALCKWIDFT<br/> RDFLSKYTKTTSIDLSSLRPSQYKDLGEYYAELNPLLYHISFQRI<br/> AEKEIMDAVETGKLYLFQIYNKDFAKGHHGKPNLHTLYWTGLF<br/> SPENLAKTSIKLNGQAELFYRPKSRMKRMAHRLGEKMLNKKLK<br/> DQKTPIDTLYQELYDYVNHRLSHDLSDEARALLPNVITKEVSHE</p> |

|  |  |                                                                                                                                                                                                                                                                                                                                                                                                                                                                                                      |
|--|--|------------------------------------------------------------------------------------------------------------------------------------------------------------------------------------------------------------------------------------------------------------------------------------------------------------------------------------------------------------------------------------------------------------------------------------------------------------------------------------------------------|
|  |  | IHKDRRFTSDKFFFHVPITLNYQAANSPSKFNQRVNAYLKEHPETP<br>IIGIDRGERNLIYITVIDSTGKILEQRSNTIQFDYQKCLDNREKE<br>RVAARQAWSVVGTIKDLKQGYLSQVIHEIVDLMIHYQAVVVLE<br>NLNFGFKSKRTGIAEKAVYQQFEKMLIDKLNCLVLKDYPAEKVG<br>GVLNPHYQLTDQFTSFAKMGTSQGFIFYVPAPYTSKIDPLTGFVDP<br>FVWKTIKNHESRKHFLGFDLHYDVKTGDFILHFKMNRNLSFQ<br>RGLPGFMPAWDIVFEKNETQFDAKGTPIAGKRIVPVIEHRFTG<br>RYRDLYPANELIALLEEKGIVFRDGSNILPKLLENDSSHAIIDTMV<br>ALIRSVLQMRNSNAATGEDYINSPVRDLNGVCFDSRFQNPWPM<br>DADANGAYHIALKGQLLNHLKESKDLKLQNGISNQDWLAYIQ<br>ELRN |
|--|--|------------------------------------------------------------------------------------------------------------------------------------------------------------------------------------------------------------------------------------------------------------------------------------------------------------------------------------------------------------------------------------------------------------------------------------------------------------------------------------------------------|

**Table S7. sgRNAs used for the *in vitro* cleavage assay.**

| <b>Cas effector</b> | <b>Species</b>                | <b>sgRNA sequence*</b>                                                                                                                              | <b>Main Text Fig.</b> | <b>Suppl. Fig.</b> |
|---------------------|-------------------------------|-----------------------------------------------------------------------------------------------------------------------------------------------------|-----------------------|--------------------|
| Cas9                | <i>Streptococcus pyogenes</i> | <b>ATACGGGAGGGCTTACCATCGTTTTA</b><br>GAGCTATGCTGTTTTGGAAACAAAACA<br>GCATAGCAAGTTAAAATAAGGCTAGTC<br>CGTTATCAACTTGAAAAAGTGGCACCG<br>AGTCGGTGCTTTTTTTT | 2A-B                  | 3A-D               |
| Cas9                | <i>Staphylococcus aureus</i>  | <b>TATCGTAGTTATCTACACGACGGTTT</b><br>TAGTACTCTGGAAACAGAATCTACTAA<br>AACAAGGCAAAATGCCGTGTTTATCTC<br>GTCAACTTGTTGGCGAGATTTTT                          | 2C-D                  | 4A-B               |
| Cas9                | <i>Streptococcus iniae</i>    | <b>ATACGGGAGGGCTTACCATCGTTTTA</b><br>GAGCTGTGTTGAAAAACACAGCAAGTT<br>AAAATAAGGCTTGTCCGTAATCAACTT<br>GAAAAAGTGAACACCGATTCCGGTGTTT<br>TTTT             | 3A-B                  | 6A-D               |
| Cas12a              | <i>Acidaminococcus sp.</i>    | <b>AAUUUCUACUCUUGUAGAUAAAGUGC</b><br><b>UCAUCAUUGGAAAACGU</b>                                                                                       | -                     | 5C                 |

\* Spacer sequences are shown in bold

**Table S8. DNA target used for the *in vitro* cleavage assay.**

| Cas effector | Species                            | DNA target sequence*                                                                                                                                                                                                                                                                                                                                                                                                                                                                                                                                                                                                                                                                                                                                                                                                                                                                                                                                                                                                                                                                                                                                                                                                       | Main Text Fig. | Suppl. Fig. |
|--------------|------------------------------------|----------------------------------------------------------------------------------------------------------------------------------------------------------------------------------------------------------------------------------------------------------------------------------------------------------------------------------------------------------------------------------------------------------------------------------------------------------------------------------------------------------------------------------------------------------------------------------------------------------------------------------------------------------------------------------------------------------------------------------------------------------------------------------------------------------------------------------------------------------------------------------------------------------------------------------------------------------------------------------------------------------------------------------------------------------------------------------------------------------------------------------------------------------------------------------------------------------------------------|----------------|-------------|
| Cas9         | <i>Streptococcus pyogenes</i>      | AATAATGGTTTCTTAGACGTCAGGTGGCACTTTTCGGGGA<br>AATGTGCGCGGAACCCCTATTTGTTTATTTTCTAAATAC<br>ATTCAAATATGTATCCGCTCATGAGACAATAACCCTGATA                                                                                                                                                                                                                                                                                                                                                                                                                                                                                                                                                                                                                                                                                                                                                                                                                                                                                                                                                                                                                                                                                            | 2A-B           | 3A-D        |
| Cas9         | <i>Staphylococcus aureus</i>       | AATGCTTCAATAATATTGAAAAAGGAAGAGTATGAGTAT<br>TCAACATTTCCGTGTCGCCCTTATTCCCTTTTTTGCGGCAT<br>TTTGCCCTTCTGTTTTGTCTACCCAGAAACGCTGGTGAA                                                                                                                                                                                                                                                                                                                                                                                                                                                                                                                                                                                                                                                                                                                                                                                                                                                                                                                                                                                                                                                                                            | 2C-D           | 4A-B        |
| Cas9         | <i>Streptococcus iniae</i> UEL-Si1 | AGTAAAAGATGCTGAAGATCAGTTGGGTGCACGAGTGGG<br>TTACATCGAACTGGATCTCAACAGCGGTAAGATCCTTGA<br>GAGTTTTCGCCCCGAAGA <b>ACGTTTTCCAATGATGAGCACT</b>                                                                                                                                                                                                                                                                                                                                                                                                                                                                                                                                                                                                                                                                                                                                                                                                                                                                                                                                                                                                                                                                                     | 3A-B           | 6A-D        |
| Cas12a       | <i>Acidaminococcus</i> sp.         | <b>TTT</b> AAAGTTCTGCTATGTGGCGCGGTATTATCCCATTG<br>ACGCCGGGCAAGAGCAACTCGGTCGCCCATACACTATT<br>CTCAGAATGACTTGTTGAGTACTACCAGTCACAGAAA<br>AGCATCTTACGGATGGCATGACAGTAAGAGAATTATGCA<br>GTGCTGCCATAACCATGAGTGATAAACTGCGGCCAACT<br>TACTTCTGACAACGATCGGAGGACCGAAGGAGCTAACCG<br>CTTTTTTGACAACATGGGGGATCATGTAACTCGCCCTTGA<br>TCGTTGGGAACCGGAGCTGAATGAAGCCATAACAAACGA<br>CGAGCGTGACACCACGATGCCTGTAGCAATGGCAACAAC<br>GTTGCGCAAACTATTAACCTGGCGAACTACTTACTTAGCT<br>TCCCAGCAACAATTAATAGACTGGATGGAGGCGGATAAA<br>GTTGCAGGACCACTTCTGCGCTCGGCCCTTCCGGCTGGCT<br>GGTTTATTGCTGATAAATCTGGAGCCGGTGAGCGTGGGTC<br>TCGCGGTATCATTGCAGCACTGGGGCCAGATGGTAAGCC<br><b>CTCCCGTATCGTAGTTATCTACACG</b> ACGGGGAGTCAGG<br>CAACTATGGATGAACGAAATAGACAGATCGCTGAGATAG<br>GTGCCTCACTGATTAAGCATTGGTAACTGTCAGACCAAGT<br>TTACTCATATATACTTTAGATTGATTTAAAACCTTCATTTTT<br>AATTTAAAAGGATCTAGGTGAAGATCCTTTTTGATAATCT<br>CATGACCAAAAATCCCTAACGTGAGTTTTCGTTCCACTGA<br>GCGTCAGACCCCGTAGAAAAGATCAAAGGATCTTCTTGA<br>GATCCTTTTTTCTGCGCGTAATCTGCTGCTTGCAAACAA<br>AAAAACCACCGTACCAGCGGTGGTTTGTGGCCGGATC<br>AAGAGCTACCAACTCTTTTTCCGAAGGTAAGTGGCTTCAG<br>CAGAGCGCAGATACCAAATACTGTCCTTCTAGTGTAGCC<br>GTAGTTAGGCCACCACTTCAAGAACTCTGTAGCACCGCCT<br>ACATACCTCGCTCTGCTAATCCTGTTACCAGTGGCTGCTG | -              | 5C          |

|  |                                                                                                                                                                                                                                                                                                                                                                                                                                                                                                                                                                                                                                                                                                                                                                                                                                                                                                                                                                                              |   |    |
|--|----------------------------------------------------------------------------------------------------------------------------------------------------------------------------------------------------------------------------------------------------------------------------------------------------------------------------------------------------------------------------------------------------------------------------------------------------------------------------------------------------------------------------------------------------------------------------------------------------------------------------------------------------------------------------------------------------------------------------------------------------------------------------------------------------------------------------------------------------------------------------------------------------------------------------------------------------------------------------------------------|---|----|
|  | <p>CCAGTGGCGATAAGTCGTGTCTTACCGGGTTGGACTCAA<br/> GACGATAGTTACCGGATAAGGCGCAGCGGTCTGGGCTGAA<br/> CGGGGGTTTCGTGCACACAGCCCAGCTTGGAGCGAACGA<br/> CCTACACCGAACTGAGATACCTACAGCGTGAGCTATGAG<br/> AAAGCGCCACGCTTCCCGAAGGGAGAAAGGCGGACAGG<br/> TATCCGGTAAGCGGCAGGGTCGGAACAGGAGAGCGCAC<br/> GAGGGAGCTTCCAGGGGGAAACGCCTGGTATCTTTATAG<br/> TCCTGTCGGGTTTCGCCACCTCTGACTTGAGCGTCGATTT<br/> TTGTGATGCTCGTCAGGGGGCGGAGCCTGTGGAAAAAC<br/> GCCAGCAACGCGGCCTTTTTACGGTTCCTGGCCTTTTGCT<br/> GGCCTTTTGCTCACATGTTCTTTCCTGCGTTATCCCCTGAT<br/> TCTGTGGATAACCGTATTACCGCAGAGTTTGTAGAAACGC<br/> AAAAAGGCCATCCGTCAGGATGGCCTTCTGCTTAATTTGA<br/> TGCCTGGCAGTTTATGGCGGGCGTCCTGCCCGCCACCCTC<br/> CGGGCCGTTGCTTCGCAACGTTCAAATCCGCTCCCGGCGG<br/> TTGAGAAGAGAAAAGAAAACCGCGATCCTGTCCACCGC<br/> ATTACTGCAAGGTAGTGGACAAGACCGGCGGTCTTAAGT<br/> TTTTTGGCTGAAATGCCTGGCAGTTCCTACTCTCGCATG<br/> GGGCTCGCGGTTAACTGATTATTTATTTATCTAGGCTAC<br/> TTACGAACG</p> <p><b>DNA mimic**</b></p> <p>GCTGACAATGATACGAACGAGACACACGCTCACGACTCA<br/> G</p> | - | 3B |
|--|----------------------------------------------------------------------------------------------------------------------------------------------------------------------------------------------------------------------------------------------------------------------------------------------------------------------------------------------------------------------------------------------------------------------------------------------------------------------------------------------------------------------------------------------------------------------------------------------------------------------------------------------------------------------------------------------------------------------------------------------------------------------------------------------------------------------------------------------------------------------------------------------------------------------------------------------------------------------------------------------|---|----|

\* Target sequences are shown in blue (*Streptococcus pyogenes*, *Streptococcus iniae*), green (*Acidaminococcus sp.*) or bold (*Staphylococcus aureus*); \*\*DNA mimic used for control experiments

**Table S9. Independent testing set validation results.** 20 proteomes containing non-redundant (<40% sequence identity) Acrs from bacterial and phage sources were ranked using AcRanker and blastp. Bacterial proteomes that had Acrs within PHASTER-predicted prophages were also tested with a subset of the proteome containing only the prophage proteins. Cases where the top rank is returned are in boldface.

| Acr Accession # | Acr Family | Complete Proteome |               |             | Prophage Subset |               |             |
|-----------------|------------|-------------------|---------------|-------------|-----------------|---------------|-------------|
|                 |            | Proteome size     | AcRanker rank | Blastp rank | Proteome size   | AcRanker rank | Blastp rank |
| WP_064584002.1  | AcrIE4-F7  | 6260              | 68            | <b>1</b>    | 111             | 4             | <b>1</b>    |
| WP_074973300.1  | AcrIE5     | 5731              | 10            | 63          | -               | -             | -           |
| WP_087937214.1  | AcrIE6     | 6794              | 80            | 4383        | -               | -             | -           |
| WP_087937215.1  | AcrIE7     | 6794              | 742           | 6546        | -               | -             | -           |
| WP_038819808.1  | AcrIF11    | 5888              | 138           | 2995        | 64              | 3             | 38          |
| WP_033936089.1  | AcrIF11.1  | 6373              | 38            | 2293        | 92              | <b>1</b>      | 38          |
| EGE18857.1      | AcrIF11.2  | 1844              | 412           | 90          | 59              | 30            | <b>1</b>    |
| ABR13388.1      | AcrIF12    | 121               | 7             | 10          | -               | -             | -           |
| EGE18854.1      | AcrIF13    | 1844              | 187           | 755         | -               | -             | -           |
| AKI27193.1      | AcrIF14    | 68                | 14            | 3           | 68              | 14            | 3           |
| WP_046701304.1  | AcrIC1     | 1944              | 6             | 313         | 72              | <b>1</b>      | 15          |
| WP_014930691.1  | AcrIIA3    | 2822              | 10            | 1184        | 74              | 2             | 40          |
| WP_149028791.1  | AcrIIA6    | 40                | 23            | 21          | 40              | 23            | 21          |
| All65827.1      | AcrIIA7    | 4519              | 179           | 2208        | -               | -             | -           |
| WP_004289410.1  | AcrIIA9    | 4286              | 53            | 930         | -               | -             | -           |
| AKS70260.1      | AcrIIA13   | 2278              | 22            | 355         | 145             | 3             | 29          |
| WP_002642161.1  | AcrIIC5    | 2170              | 10            | 1954        | 367             | 6             | 237         |
| NP_666582.1     | AcrIIIB1   | 54                | 44            | 25          | 54              | 44            | 25          |
| WP_046701302.1  | AcrVA1     | 1944              | 114           | 376         | 72              | 10            | 18          |
| WP_046699156.1  | AcrVA4     | 2105              | 1100          | 1405        | 293             | 220           | 81          |

**Table S10. List of expected lethal self-targeting *Streptococcus* genomes obtained with Self-Target Spacer Searcher (STSS).** Searching *Streptococcus* assemblies from NCBI with STSS returned 385 cases of self-targeting derived from type II-A arrays representing 241 individual genomes. Of those genomes, 20 contained at least one spacer with the characteristic NRG 3' PAM for SpyCas9, shown in the table below. Only *Streptococcus iniae* strain UEL-Si1 contains a previously discovered anti-CRISPR (AcrIIA3). Also shown in the table are the self-targeting spacers for *Listeria monocytogenes* strain R2-502, which was also ranked with AcRanker.

| Target Accession# | Locus Accession#              | Species/Strain                            | Self-Targeting Spacer Sequence(s) | 3' PAM Region                        | Anti-CRISPRs Present        |
|-------------------|-------------------------------|-------------------------------------------|-----------------------------------|--------------------------------------|-----------------------------|
| NZ_MNAC01000031.1 | NZ_MNAC01000010.1             | <i>Streptococcus iniae</i> strain UEL-Si1 | TTGATAAGTATAATTCCTGTCTTTGTTTT     | AGGAGTTTT                            | AcrIIA3<br>(WP_071127625.1) |
| NZ_MNAC01000046.1 |                               |                                           | TAAGGAATTTGAAGCAATACGTCTTAATTT    | AGCAATGAC                            |                             |
| NZ_MNAC01000023.1 |                               |                                           | CAAAAAAGTTCGGTAACTTACGGTAACTTA    | CGGTAACTT                            |                             |
|                   |                               |                                           | TCTAAAAAATCAAAAGTTACCGTGTTACCG    | TAGTTTTGA                            |                             |
|                   |                               |                                           | AATATGACTTTTGGGAAATTAATAATCAA     | TGGCTGAAA                            |                             |
|                   |                               |                                           | TTTTTGAGTGACTGATGTTGCTTTTGAGC     | TGGCCACTT                            |                             |
| NZ_MNAC01000021.1 |                               |                                           | ATAATCAATCACATTAATGCTGACATCAAC    | TGGAGCAGA                            |                             |
|                   |                               |                                           | GAGTTTAATTAAGTGACATAATATCTTCAT    | CGGTTATAG                            |                             |
| NZ_JRLL01000002.1 |                               |                                           | NZ_JRLL01000058.1                 | <i>Streptococcus pyogenes</i> SS1447 |                             |
| NZ_JRLL01000072.1 | CTATATTGTTGAGCTGTGGGCTTTCATAA | AGGTTTAAA                                 |                                   |                                      |                             |

|                   |                   |                                                     |                                |            |      |
|-------------------|-------------------|-----------------------------------------------------|--------------------------------|------------|------|
| NZ_JRL01000026.1  |                   |                                                     | GTAATAATAGCATTGCCTGTTCTATCCTGT | CGGTAGAAC  |      |
| NZ_CQAV01000003.1 | NZ_CQAV01000001.1 | <i>Streptococcus agalactiae</i><br>strain DE-NI-032 | TATTTGATAGCGGTAACGGGTCATATACAA | AGGCATCTA  | None |
|                   |                   |                                                     | TGGTGGTATTTATAATGTACGAGCAAATCG | AGGCGCTCC  |      |
|                   |                   |                                                     | ACCTTGCTCCGATGACACCATCGCGAACCT | TGGTCTAAT  |      |
| NZ_CP010449.1     | NZ_CP010449.1     | <i>Streptococcus pyogenes</i><br>strain NGAS322     | ATCGTAAGGCAACAGATTATCGTAAGATCT | AGGTGTATA  | None |
| NZ_ALQN01000014.1 | NZ_ALQN01000018.1 | <i>Streptococcus agalactiae</i><br>CCUG 37430       | ATTTGCAACTTTCTCAAGTGTGCGAGAGA  | TGGAGAATT  | None |
| NZ_ALQN01000018.1 |                   |                                                     | GCAAGCACTAAATGAAGCTACTAGACTTAA | AGGTTCGCAG |      |
|                   |                   |                                                     | TAATGACATGTGGATTGATATCTCAGAGAA | CGGCGATTA  |      |
|                   |                   |                                                     | TGTCATTGTTAAAAATCATTTCATATTTTT | TGGATATAA  |      |
|                   |                   |                                                     | TACTTGACGAATTGAAGATGACGGAATTTA | TTGCTCCAC  |      |
| NZ_CPVL01000019.1 | NZ_CPVL01000003.1 | <i>Streptococcus agalactiae</i><br>strain DE-NI-007 | AAGGCACGCGCAAGATGAATTCATTTCTAA | TGGCTACAC  | None |
|                   |                   |                                                     | TGATGTTCTTTATCAAACATTCTAAATACT | TGGAAGCCC  |      |
|                   |                   |                                                     | GAGCCTTGCTTGAGTTTGTGGAGCTTTATA | GGGATGGAA  |      |
|                   |                   |                                                     | GTATAATTTAGTTAAGCTTAAATTTAACCA | AGGAGACGT  |      |



|                   |                                 |                                                     |                                   |           |      |
|-------------------|---------------------------------|-----------------------------------------------------|-----------------------------------|-----------|------|
| NZ_ANCM01000101.1 | NZ_ANCM01000101.1               | <i>Streptococcus agalactiae</i><br>FSL S3-586       | GAAAAAGGCGATGTAGCTTAGAAAGGAGAA    | GGGATGGAA | None |
| NZ_ANCM01000006.1 | GAAAAAGGCGATGTAGCTTAGAAAGGAGAA  |                                                     | CACCATGAA                         |           |      |
| NZ_ANCM01000028.1 | TACGAAAAGGTTGTGATAAAAAGCCATATCA |                                                     | TCGAGTTTG                         |           |      |
| NZ_ALTM01000012.1 | NZ_ALTM01000016.1               | <i>Streptococcus agalactiae</i><br>GB00548          | AACAAC TTTCTTACAAAAGTTCTAGTTTTCTT | TCGCAAAAC |      |
| NZ_ALTM01000013.1 | ACGCTCTGAGGCAGATGAGGAACAGGCGCA  |                                                     | TAGGCACCC                         |           |      |
| NZ_ALUZ01000056.1 | NZ_ALUZ01000054.1               | <i>Streptococcus agalactiae</i><br>GB00984          | TGAAAACAAGCGCAAAGCTGTCAGAAAACA    | CGGAACTAA | None |
|                   | TACTTGACGAATTGAAGATGACGGAATTTA  |                                                     | TGGCTCCAC                         |           |      |
| NZ_ALRF01000019.1 | NZ_ALRF01000066.1               | <i>Streptococcus agalactiae</i><br>BSU188           | GAAACTTCGATTAGTTTGCCTACTCGCTCA    | CGGCAAAAC | None |
| NZ_ANEM01000019.1 | NZ_ANEM01000012.1               | <i>Streptococcus agalactiae</i><br>MRI Z1-022       | TTGCTGCTAGACCCAAACAGTTTATTTTTAG   | GGCCAAAAA | None |
| NZ_ANEM01000074.1 | TATTTTCATCATAGAAAATCCTGCTAGTGGT |                                                     | CGGTTATGG                         |           |      |
| NZ_CQEL01000006.1 | NZ_CQEL01000002.1               | <i>Streptococcus agalactiae</i><br>strain DK-NI-014 | ACACCTAGTTTCAAGTTTTTAGCAGATTTTTT  | GGTTACATT | None |
| NZ_CQEL01000008.1 | ACGCTCTGAGGCAGATGAGGAACAGGCGCA  |                                                     | TAGGCACCC                         |           |      |
| NZ_MAWX01000026.1 | NZ_MAWX01000055.1               |                                                     | ATTGACTGTTTACGATTTCCCTCCACCGTT    | GGGTACAAA | None |

|                   |                   |                                                      |                                |            |      |
|-------------------|-------------------|------------------------------------------------------|--------------------------------|------------|------|
|                   |                   | <i>Streptococcus agalactiae</i><br>strain DK-PW-096  | TGATGAGATTTTTAAAAGACTCACTGATAT | AGGATTGAC  |      |
|                   |                   |                                                      | CGCTTAGATGAAGTACAGATTGTAACAAGT | TCGGAAGTA  |      |
| NZ_CTJD01000013.1 | NZ_CTJD01000001.1 | <i>Streptococcus agalactiae</i><br>strain GB-NI-015  | TGAAAACAAGCGCAAAGCTGTCAGAAAACA | CGGAACTAA  | None |
|                   |                   |                                                      | TACTTGACGAATTGAAGATGACGGAATTTA | TGGCTCCAC  |      |
| NZ_CPZS01000003.1 | NZ_CPZS01000001.1 | <i>Streptococcus agalactiae</i><br>strain IT-NI-009  | TATTTGATAGCGGTAACGGGTCATATACAA | AGGCATCTA  | None |
|                   |                   |                                                      | ACCTTGCTCCGATGACACCATCGCGAACCT | TGGTCTAAT  |      |
| NZ_CPVQ01000026.1 | NZ_CPVQ01000002.1 | <i>Streptococcus agalactiae</i><br>strain RBH12      | AACACAGCTTCCTCGAAAGGGATATATCTA | CGGACAACCT | None |
| NDGB01000049.1    | NDGB01000023.1    | <i>Streptococcus agalactiae</i><br>strain ST 618     | ATTAAGTTGCTTAGTGCTTTCATAATCATC | TGGAATAAC  | None |
| NDGB01000030.1    |                   |                                                      | ATTAAGTTGCTTAGTGCTTTCATAATCATC | TGGAATAAC  |      |
| NZ_KQ969340.1     | NZ_KQ969342.1     | <i>Streptococcus oralis</i> strain<br>DD14           | TTCCATTTCTGATTTGATTCAACAGCAGCA | GGAAATCCT  | None |
|                   |                   |                                                      | TACAGCGGATACAACCCACCAATAGCCTC  | AGGAATTGC  |      |
| NZ_KQ961462.1     | NZ_KQ961485.1     | <i>Streptococcus pasteurianus</i><br>strain GED7275A | TTTATTCGGCATCGGCTGGTGTATGGA    | TGGCTGCGG  | None |

|                   |                   |                                                   |                                |            |                                                                                                                             |
|-------------------|-------------------|---------------------------------------------------|--------------------------------|------------|-----------------------------------------------------------------------------------------------------------------------------|
| NZ_AWTL01000007.1 | NZ_AWTL01000011.1 | <i>Streptococcus pyogenes</i><br>GA03805          | TAGAGTAAACCGAATCTTTGCCATCTCTGG | CAGTTTGAC  | None                                                                                                                        |
| NZ_LRG01000012.1  | NZ_LRG01000001.1  | <i>Streptococcus pyogenes</i><br>strain SST2091-1 | TAGAGTAAACCGAATCTTTGCCATCTCTGG | CAGTTTGAC  | None                                                                                                                        |
| LRGT01000330.1    | LRGT01000062.1    | <i>Streptococcus pyogenes</i><br>strain SST2097-1 | TGGTCTAACTGCGTCTGGTCTGTGAATGA  | TAGGTACAA  | None                                                                                                                        |
| NC_021838.1       | NC_021838.1       | <i>Listeria monocytogenes</i><br>strain R2-502    | GGTAAAACAAGCATCGGCGAAGCAGTAACA | TGGCTTCTT  | AcrIIA3<br>(WP_023553812.1),<br>AcrIIA2<br>(WP_023553814.1),<br>AcrIIA1<br>(WP_003722518.1),<br>AcrIIA1<br>(WP_012581438.1) |
|                   |                   |                                                   | GGTAAAACAAGCATCGGCGAAGCAGTAACA | TGGCTACTC  |                                                                                                                             |
|                   |                   |                                                   | TAGGTTTAGGGAGTAAATTAGCTCCTTTGG | CAGCTGGGT  |                                                                                                                             |
|                   |                   |                                                   | TAACTTTAGATACTGCTAAAGAATTAGCAA | TGGTGCAAA  |                                                                                                                             |
|                   |                   |                                                   | TTGGGCAAAATGACCGTAATAAATCCATTC | CGGTTTCATC |                                                                                                                             |
|                   |                   |                                                   | TAGGTTTAGGGAGTAAATTAGCTCCTTTGG | CGGCTGGAT  |                                                                                                                             |

**Table S11. Top Acr gene candidates within each genome ranked by AcRanker.** The proteins found within the prophages of 20 *Streptococcus* genomes were ranked using AcRanker; up to the top 10 highest ranking genes are listed in ascending order. Known Acr genes and the 10 genes synthesized for biochemical testing are indicated in the rightmost column. Genomes with fewer than 10 listed have very few annotated proteins found within predicted prophages.

| Organism                                         | Source Contig     | Protein        | Rank | Candidate # or Acr |
|--------------------------------------------------|-------------------|----------------|------|--------------------|
| <i>Streptococcus iniae</i> strain UEL-Si1        | NZ_MNAC01000021.1 | WP_071127623.1 | 1    | ML1                |
|                                                  | NZ_MNAC01000023.1 | WP_071127667.1 | 2    |                    |
|                                                  |                   | WP_071127683.1 | 3    |                    |
|                                                  |                   | WP_071127693.1 | 4    |                    |
|                                                  | NZ_MNAC01000021.1 | WP_071127625.1 | 5    | AcrIIA3            |
|                                                  |                   | WP_071127624.1 | 6    |                    |
|                                                  | NZ_MNAC01000023.1 | WP_071127689.1 | 7    |                    |
|                                                  | NZ_MNAC01000021.1 | WP_071127610.1 | 8    |                    |
|                                                  | NZ_MNAC01000023.1 | WP_071127674.1 | 9    |                    |
| NZ_MNAC01000021.1                                | WP_071127619.1    | 10             |      |                    |
| <i>Streptococcus pyogenes</i> strain SS1447      | NZ_JRLL01000026.1 | WP_032460883.1 | 1    |                    |
|                                                  |                   | WP_029713970.1 | 2    |                    |
|                                                  |                   | WP_003057301.1 | 3    |                    |
|                                                  | NZ_JRLL01000072.1 | WP_032461152.1 | 4    |                    |
|                                                  |                   | WP_076634198.1 | 5    |                    |
|                                                  | NZ_JRLL01000026.1 | WP_032460878.1 | 6    |                    |
|                                                  | NZ_JRLL01000072.1 | WP_002986828.1 | 7    |                    |
|                                                  | NZ_JRLL01000026.1 | WP_080286986.1 | 8    |                    |
|                                                  |                   | WP_012678849.1 | 9    |                    |
|                                                  |                   | WP_032460877.1 | 10   |                    |
| <i>Streptococcus agalactiae</i> strain DE-NI-032 | NZ_CQAV01000003.1 | WP_000640620.1 | 1    |                    |
|                                                  |                   | WP_000164461.1 | 2    |                    |
|                                                  |                   | WP_025194532.1 | 3    |                    |
|                                                  |                   | WP_017827941.1 | 4    |                    |
|                                                  |                   | WP_050201842.1 | 5    |                    |
|                                                  |                   | WP_050305756.1 | 6    |                    |
|                                                  |                   | WP_001162136.1 | 7    |                    |

|                                                      |                   |                                               |                   |                |
|------------------------------------------------------|-------------------|-----------------------------------------------|-------------------|----------------|
|                                                      |                   | WP_000431575.1                                | 8                 |                |
|                                                      |                   | WP_000138374.1                                | 9                 |                |
|                                                      |                   | WP_001872365.1                                | 10                |                |
| <i>Streptococcus pyogenes</i><br>strain NGAS322      | NZ_CP010449.1     | WP_002983328.1                                | 1                 |                |
|                                                      |                   | WP_080370149.1                                | 2                 |                |
|                                                      |                   | WP_002983750.1                                | 3                 |                |
|                                                      |                   | WP_002984315.1                                | 4                 |                |
|                                                      |                   | WP_032465789.1                                | 5                 |                |
|                                                      |                   | WP_002982773.1                                | 6                 |                |
|                                                      |                   | WP_011054546.1                                | 7                 |                |
|                                                      |                   | WP_010921912.1                                | 8                 |                |
|                                                      |                   | WP_080370134.1                                | 9                 |                |
|                                                      |                   | WP_053308468.1                                | 10                |                |
| <i>Streptococcus agalactiae</i><br>strain CCUG 37430 | NZ_ALQN01000018.1 | WP_000649300.1                                | 1                 |                |
|                                                      |                   | WP_079261174.1                                | 2                 |                |
|                                                      |                   | WP_000660740.1                                | 3                 |                |
|                                                      |                   | WP_000076700.1                                | 4                 |                |
|                                                      |                   | WP_000033707.1                                | 5                 |                |
|                                                      |                   | WP_000343312.1                                | 6                 |                |
|                                                      |                   | WP_000130090.1                                | 7                 |                |
|                                                      |                   | WP_000582684.1                                | 8                 |                |
|                                                      |                   | WP_000431581.1                                | 9                 |                |
|                                                      |                   | WP_000323860.1                                | 10                |                |
| <i>Streptococcus agalactiae</i><br>strain DE-NI-007  | NZ_CPVL01000019.1 | WP_000694571.1                                | 1                 |                |
|                                                      |                   | WP_001166092.1                                | 2                 |                |
|                                                      |                   | WP_000359663.1                                | 3                 |                |
|                                                      |                   | WP_000141918.1                                | 4                 |                |
|                                                      |                   | WP_000648623.1                                | 5                 |                |
|                                                      |                   | WP_079260963.1                                | 6                 |                |
|                                                      |                   | WP_000205000.1                                | 7                 |                |
|                                                      |                   | WP_000130289.1                                | 8                 |                |
|                                                      |                   | WP_000946250.1                                | 9                 | ML4            |
|                                                      |                   | WP_001021397.1                                | 10                |                |
|                                                      |                   | WP_001080841.1                                | 12                | ML5            |
|                                                      |                   | <i>Streptococcus agalactiae</i><br>FSL S3-586 | NZ_ANCM01000028.1 | WP_017643458.1 |
| WP_000134940.1                                       | 2                 |                                               |                   |                |

|                                                   |                   |                |    |     |
|---------------------------------------------------|-------------------|----------------|----|-----|
|                                                   | NZ_ANCM01000006.1 | WP_001875290.1 | 3  |     |
|                                                   | NZ_ANCM01000028.1 | WP_000789102.1 | 4  |     |
|                                                   |                   | WP_003051787.1 | 5  |     |
|                                                   |                   | WP_000032136.1 | 6  |     |
|                                                   |                   | WP_000342242.1 | 7  |     |
|                                                   |                   | WP_000686776.1 | 8  |     |
|                                                   |                   | WP_000988928.1 | 9  |     |
|                                                   | NZ_ANCM01000101.1 | WP_017643459.1 | 10 |     |
| <i>Streptococcus agalactiae</i><br>strain GB00548 | NZ_ALTM01000002.1 | WP_000331953.1 | 1  |     |
|                                                   |                   | WP_000259017.1 | 2  |     |
|                                                   |                   | WP_000793595.1 | 3  |     |
|                                                   |                   | WP_079254676.1 | 4  |     |
|                                                   |                   | WP_000384271.1 | 5  | ML8 |
|                                                   |                   | WP_001018249.1 | 6  |     |
|                                                   |                   | WP_000568029.1 | 7  |     |
|                                                   |                   | WP_001097380.1 | 8  |     |
|                                                   |                   | WP_001867157.1 | 9  |     |
|                                                   |                   | WP_000656477.1 | 10 |     |
|                                                   |                   | WP_000134666.1 | 12 | ML9 |
|                                                   |                   | WP_000591144.1 | 29 | ML7 |
| <i>Streptococcus agalactiae</i><br>strain GB00984 | NZ_ALUZ01000056.1 | WP_000660738.1 | 1  |     |
|                                                   |                   | WP_000164461.1 | 2  |     |
|                                                   |                   | WP_017827941.1 | 3  |     |
|                                                   |                   | WP_000965653.1 | 4  |     |
|                                                   |                   | WP_000431574.1 | 5  |     |
|                                                   |                   | WP_000138374.1 | 6  |     |
|                                                   |                   | WP_000614971.1 | 7  |     |
|                                                   |                   | WP_000258802.1 | 8  |     |
|                                                   |                   | WP_000763911.1 | 9  |     |
|                                                   |                   | WP_000118546.1 | 10 |     |
| <i>Streptococcus agalactiae</i><br>strain BSU188  | NZ_ALRF01000068.1 | WP_001042289.1 | 1  |     |
|                                                   |                   | WP_000965633.1 | 2  | ML6 |
|                                                   |                   | WP_025194532.1 | 3  |     |
|                                                   |                   | WP_000660741.1 | 4  |     |
|                                                   |                   | WP_001162136.1 | 5  |     |
|                                                   |                   | WP_000274022.1 | 6  |     |

|                                                      |                   |                |    |      |
|------------------------------------------------------|-------------------|----------------|----|------|
|                                                      |                   | WP_000076712.1 | 7  |      |
|                                                      |                   | WP_001183891.1 | 8  |      |
|                                                      |                   | WP_000431576.1 | 9  |      |
|                                                      |                   | WP_000763914.1 | 10 |      |
| <i>Streptococcus agalactiae</i><br>strain MRI Z1-022 | NZ_ANEM01000074.1 | WP_017648179.1 | 1  |      |
|                                                      |                   | WP_079265830.1 | 2  |      |
|                                                      |                   | WP_000033707.1 | 3  |      |
|                                                      |                   | WP_000582684.1 | 4  |      |
|                                                      |                   | WP_017648175.1 | 5  |      |
|                                                      |                   | WP_017648177.1 | 6  |      |
|                                                      |                   | WP_000802599.1 | 7  |      |
|                                                      |                   | WP_000343901.1 | 8  |      |
|                                                      |                   | WP_025195242.1 | 9  |      |
|                                                      |                   | WP_000142566.1 | 10 |      |
| <i>Streptococcus agalactiae</i><br>strain DK-NI-014  | NZ_CQEL01000002.1 | WP_000421991.1 | 1  |      |
|                                                      |                   | WP_000640620.1 | 2  |      |
|                                                      |                   | WP_011058321.1 | 3  | ML10 |
|                                                      |                   | WP_000965642.1 | 4  |      |
|                                                      |                   | WP_000660741.1 | 5  |      |
|                                                      |                   | WP_000906736.1 | 6  |      |
|                                                      |                   | WP_001162136.1 | 7  |      |
|                                                      |                   | WP_000076715.1 | 8  |      |
|                                                      |                   | WP_000027835.1 | 9  |      |
|                                                      |                   | WP_001872365.1 | 10 |      |
| <i>Streptococcus agalactiae</i><br>strain DK-PW-096  | NZ_MAWX01000026.1 | WP_000258802.1 | 1  |      |
|                                                      |                   | WP_001229661.1 | 2  |      |
|                                                      |                   | WP_001921522.1 | 3  |      |
|                                                      |                   | WP_000774601.1 | 4  |      |
|                                                      |                   | WP_011324937.1 | 5  |      |
|                                                      |                   | WP_000218309.1 | 6  |      |
|                                                      |                   | WP_079261306.1 | 7  |      |
|                                                      |                   | WP_000411527.1 | 8  |      |
|                                                      |                   | WP_001270064.1 | 9  |      |
|                                                      |                   | WP_000659174.1 | 10 |      |
| <i>Streptococcus agalactiae</i><br>strain GB-NI-015  | NZ_CTJD01000013.1 | WP_000640620.1 | 1  |      |
|                                                      |                   | WP_000660738.1 | 2  |      |

|                                                     |                   |                |    |  |
|-----------------------------------------------------|-------------------|----------------|----|--|
|                                                     |                   | WP_000164461.1 | 3  |  |
|                                                     |                   | WP_017827941.1 | 4  |  |
|                                                     |                   | WP_000965655.1 | 5  |  |
|                                                     |                   | WP_000431574.1 | 6  |  |
|                                                     |                   | WP_000138374.1 | 7  |  |
|                                                     |                   | WP_001872365.1 | 8  |  |
|                                                     |                   | WP_000614971.1 | 9  |  |
|                                                     |                   | WP_000258802.1 | 10 |  |
| <i>Streptococcus agalactiae</i><br>strain IT-NI-009 | NZ_CPZS01000003.1 | WP_000640620.1 | 1  |  |
|                                                     |                   | WP_000164461.1 | 2  |  |
|                                                     |                   | WP_079261174.1 | 3  |  |
|                                                     |                   | WP_050201842.1 | 4  |  |
|                                                     |                   | WP_001162136.1 | 5  |  |
|                                                     |                   | WP_000431575.1 | 6  |  |
|                                                     |                   | WP_000138374.1 | 7  |  |
|                                                     |                   | WP_001872365.1 | 8  |  |
|                                                     |                   | WP_000474006.1 | 9  |  |
|                                                     |                   | WP_000258802.1 | 10 |  |
| <i>Streptococcus agalactiae</i><br>strain RBH12     | NZ_CPVQ01000026.1 | WP_000650503.1 | 1  |  |
|                                                     |                   | WP_000164461.1 | 2  |  |
|                                                     |                   | WP_079261174.1 | 3  |  |
|                                                     |                   | WP_050198474.1 | 4  |  |
|                                                     |                   | WP_001058281.1 | 5  |  |
|                                                     |                   | WP_079454162.1 | 6  |  |
|                                                     |                   | WP_050199334.1 | 7  |  |
|                                                     |                   | WP_000612386.1 | 8  |  |
|                                                     |                   | WP_000963485.1 | 9  |  |
|                                                     |                   | WP_000206191.1 | 10 |  |
| <i>Streptococcus agalactiae</i><br>strain ST 618    | NDGB01000030.1    | OTG45472.1     | 1  |  |
|                                                     |                   | OTG45475.1     | 2  |  |
|                                                     |                   | OTG45496.1     | 3  |  |
|                                                     |                   | OTG45484.1     | 4  |  |
|                                                     |                   | OTG45499.1     | 5  |  |
|                                                     |                   | OTG45477.1     | 6  |  |
|                                                     |                   | OTG45479.1     | 7  |  |
|                                                     |                   | OTG45483.1     | 8  |  |



|                                                   |                   |                |    |  |
|---------------------------------------------------|-------------------|----------------|----|--|
|                                                   |                   | OTG45481.1     | 9  |  |
|                                                   |                   | OTG45480.1     | 10 |  |
| <i>Streptococcus oralis</i> strain DD14           | NZ_KQ969340.1     | WP_061420077.1 | 1  |  |
|                                                   |                   | WP_061420097.1 | 2  |  |
|                                                   |                   | WP_061420111.1 | 3  |  |
|                                                   |                   | WP_061420115.1 | 4  |  |
|                                                   |                   | WP_061420334.1 | 5  |  |
|                                                   |                   | WP_061420080.1 | 6  |  |
|                                                   |                   | WP_061420123.1 | 7  |  |
|                                                   |                   | WP_061420133.1 | 8  |  |
|                                                   |                   | WP_061420073.1 | 9  |  |
|                                                   |                   | WP_061420062.1 | 10 |  |
| <i>Streptococcus pasteurianus</i> strain GED7275A | NZ_KQ961462.1     | WP_061100257.1 | 1  |  |
|                                                   |                   | WP_061100237.1 | 2  |  |
|                                                   |                   | WP_061100224.1 | 3  |  |
|                                                   |                   | WP_061100243.1 | 4  |  |
|                                                   |                   | WP_061100244.1 | 5  |  |
|                                                   |                   | WP_061100249.1 | 6  |  |
|                                                   |                   | WP_082731474.1 | 7  |  |
|                                                   |                   | WP_061100238.1 | 8  |  |
|                                                   |                   | WP_061100250.1 | 9  |  |
|                                                   |                   | WP_061100233.1 | 10 |  |
| <i>Streptococcus pyogenes</i> GA03805             | NZ_AWTL01000007.1 | WP_011528797.1 | 1  |  |
|                                                   |                   | WP_011888786.1 | 2  |  |
|                                                   |                   | WP_023079933.1 | 3  |  |
|                                                   |                   | WP_023079900.1 | 4  |  |
|                                                   |                   | WP_023079918.1 | 5  |  |
|                                                   |                   | WP_002985387.1 | 6  |  |
|                                                   |                   | WP_011528776.1 | 7  |  |
|                                                   |                   | WP_023079897.1 | 8  |  |
|                                                   |                   | WP_011017565.1 | 9  |  |
|                                                   |                   | WP_023079923.1 | 10 |  |
| <i>Streptococcus pyogenes</i> strain SST2091-1    | NZ_LRGN01000012.1 | WP_011889039.1 | 1  |  |
|                                                   |                   | WP_011285632.1 | 2  |  |
|                                                   |                   | WP_010922455.1 | 3  |  |
|                                                   |                   | WP_010922464.1 | 4  |  |

|                                                   |                |                |    |         |
|---------------------------------------------------|----------------|----------------|----|---------|
|                                                   |                | WP_002994106.1 | 5  |         |
|                                                   |                | WP_002994744.1 | 6  |         |
|                                                   |                | WP_063629031.1 | 7  |         |
|                                                   |                | WP_080464960.1 | 8  |         |
|                                                   |                | WP_063629030.1 | 9  |         |
|                                                   |                | WP_063629029.1 | 10 |         |
| <i>Streptococcus pyogenes</i><br>strain SST2097-1 | LRGT01000330.1 | OAC70929.1     | 1  |         |
|                                                   |                | OAC70939.1     | 2  |         |
|                                                   |                | OAC70918.1     | 3  |         |
|                                                   |                | OAC70933.1     | 4  |         |
|                                                   |                | OAC70928.1     | 5  |         |
|                                                   |                | OAC70915.1     | 6  |         |
|                                                   |                | OAC70921.1     | 7  |         |
|                                                   |                | OAC70941.1     | 8  |         |
|                                                   |                | OAC70938.1     | 9  |         |
|                                                   |                | OAC70937.1     | 10 |         |
| <i>Listeria monocytogenes</i><br>strain R2-502    | NC_021838.1    | WP_003731672.1 | 1  |         |
|                                                   |                | WP_003733710.1 | 2  |         |
|                                                   |                | WP_003731277.1 | 3  | ML2     |
|                                                   |                | WP_003731276.1 | 4  | ML3     |
|                                                   |                | WP_023553812.1 | 5  | AcrIIA3 |
|                                                   |                | WP_014601509.1 | 6  |         |
|                                                   |                | WP_003733721.1 | 7  |         |
|                                                   |                | WP_003731655.1 | 8  |         |
|                                                   |                | WP_003725074.1 | 9  |         |
|                                                   |                | WP_014601388.1 | 10 |         |
|                                                   |                | WP_023553814.1 | 34 | AcrIIA2 |
|                                                   |                | WP_003722518.1 | 71 | AcrIIA1 |
|                                                   |                | WP_012581438.1 | 95 | AcrIIA1 |

**Table S12. BLAST vs. AcRanker rankings for the selection candidates ML1-ML10.** After selecting the 10 candidate proteins for biochemical investigation, we performed a blastp ranking to determine the ability of BLAST to predict new Acr proteins. The three validated anti-CRISPRs are indicated with tan shading and in all three cases, AcRanker gives a much higher ranking than BLAST.

| <b>Candidate</b> | <b>Prophage proteome size</b> | <b>Blastp rank (e-value)</b> | <b>AcRanker rank</b> |
|------------------|-------------------------------|------------------------------|----------------------|
| ML1 (AcrIIA20)   | 56                            | 12 (0.38)                    | 1                    |
| ML2              | 190                           | 155 (4.85)                   | 1                    |
| ML3 (AcrIIA12)   | 190                           | 132 (2.48)                   | 2                    |
| ML4              | 26                            | 4 (0.16)                     | 9                    |
| ML5              | 26                            | 16 (0.7)                     | 12                   |
| ML6              | 75                            | 37 (1.3)                     | 2                    |
| ML7              | 32                            | 29 (5.84)                    | 29                   |
| ML8 (AcrIIA21)   | 32                            | 27 (3.24)                    | 5                    |
| ML9              | 11                            | 11 (0.5)                     | 12                   |
| ML10             | 74                            | 74 (4.5)                     | 3                    |

## References

1. Lundberg,S.M. and Lee,S.-I. (2017) A Unified Approach to Interpreting Model Predictions. *Advances in Neural Information Processing Systems*.
2. Shen,J., Zhang,J., Luo,X., Zhu,W., Yu,K., Chen,K., Li,Y. and Jiang,H. (2007) Predicting protein-protein interactions based only on sequences information. *Proc. Natl. Acad. Sci. USA*, **104**, 4337–4341.
3. Pawluk,A., Bondy-Denomy,J., Cheung,V.H.W., Maxwell,K.L. and Davidson,A.R. (2014) A New Group of Phage Anti-CRISPR Genes Inhibits the Type I-E CRISPR-Cas System of *Pseudomonas aeruginosa*. *mBio*, **5**, e00896-14.
4. Bondy-Denomy,J., Pawluk,A., Maxwell,K.L. and Davidson,A.R. (2013) Bacteriophage genes that inactivate the CRISPR/Cas bacterial immune system. *Nature*, **493**, 429–432.
5. Pawluk,A., Staals,R.H.J., Taylor,C., Watson,B.N.J., Saha,S., Fineran,P.C., Maxwell,K.L. and Davidson,A.R. (2016) Inactivation of CRISPR-Cas systems by anti-CRISPR proteins in diverse bacterial species. *Nat. Microbiol.*, **1**, 16085.
6. Rauch,B.J., Silvis,M.R., Hultquist,J.F., Waters,C.S., McGregor,M.J., Krogan,N.J. and Bondy-Denomy,J. (2017) Inhibition of CRISPR-Cas9 with Bacteriophage Proteins. *Cell*, **168**, 150–158.
7. Hynes,A.P., Rousseau,G.M., Lemay,M.L., Horvath,P., Romero,D.A., Fremaux,C. and Moineau,S. (2017) An anti-CRISPR from a virulent streptococcal phage inhibits *Streptococcus pyogenes* Cas9. *Nat. Microbiol.*, **2**, 1374–1380.
8. Marino,N.D., Zhang,J.Y., Borges,A.L., Sousa,A.A., Leon,L.M., Rauch,B.J., Walton,R.T., Berry,J.D., Joung,J.K., Kleinstiver,B.P., *et al.* (2018) Discovery of widespread type I and type V CRISPR-Cas inhibitors. *Science*, **362**, 240–242.
9. Hynes,A.P., Rousseau,G.M., Agudelo,D., Goulet,A., Amigues,B., Loehr,J., Romero,D.A., Fremaux,C., Horvath,P., Doyon,Y., *et al.* (2018) Widespread anti-CRISPR proteins in virulent bacteriophages inhibit a range of Cas9 proteins. *Nat. Commun.*, **9**, 2919.
10. Uribe,R. V, van der Helm,E., Misiakou,M.A., Lee,S.W., Kol,S. and Sommer,M.O.A. (2019) Discovery and Characterization of Cas9 Inhibitors Disseminated across Seven Bacterial Phyla. *Cell Host and Microbe*, **25**, 233–241.
11. Watters,K.E., Shivram,H., Fellmann,C., Lew,R.J., McMahon,B. and Doudna,J.A. (2020) Potent CRISPR-Cas9 inhibitors from *Staphylococcus* genomes. *Proc. Natl. Acad. Sci. USA*, **117**, 1–9.
12. Lee,J., Mir,A., Edraki,A., Garcia,B., Amrani,N., Lou,H.E., Gainetdinov,I., Pawluk,A., Ibraheim,R., Gao,X.D., *et al.* (2018) Potent Cas9 inhibition in bacterial and human cells by AcrIIC4 and AcrIIC5 anti-CRISPR proteins. *mBio*, **9**, 1–17.
13. Bhoobalan-Chitty,Y., Johansen,T.B., Di Cianni,N. and Peng,X. (2019) Inhibition of Type III CRISPR-Cas Immunity by an Archaeal Virus-Encoded Anti-CRISPR Protein. *Cell*, **179**, 448-458.e11.
14. Kyle E. Watters, Christof Fellmann, Hua B. Bai, Shawn M. Ren and Jennifer A. Doudna (2018) Systematic discovery of natural CRISPR-Cas12a inhibitors. *Science*, **362**, 236–239.
